# Supplementary material
Source: PubMed Central journal article supplement (PMC6217430)
Supplement: pnas.1812125115.sapp.pdf [file pnas.1812125115.sapp.pdf]

# Supplementary Information for

## RPA1 binding to NRF2 switches ARE-dependent transcriptional activation to ARE-NRE-dependent repression

Pengfei Liu<sup>1</sup>, Montserrat Rojo de la Vega<sup>1</sup>, Saad Sammani<sup>2</sup>, Joseph B Mascarenhas<sup>2</sup>, Michael Kerins<sup>1</sup>, Matthew Dodson<sup>1</sup>, Xiaoguang Sun<sup>2</sup>, Ting Wang<sup>2</sup>, Aikseng Ooi<sup>1</sup>, Joe GN Garcia<sup>2\*</sup>, and Donna D. Zhang<sup>1,3,\*</sup>

<sup>1</sup>Department of Pharmacology and Toxicology, College of Pharmacy, University of Arizona, Tucson, Arizona 85721, USA

<sup>2</sup>Department of Medicine, University of Arizona Health Sciences, University of Arizona, Tucson, Arizona 85721, USA

<sup>3</sup>The University of Arizona Cancer Center, University of Arizona, Tucson, Arizona 85721, USA

\*Correspondence to: J.G.N.G (skipgarcia@email.arizona.edu), D.D.Z (dzhang@pharmacy.arizona.edu)

### **This PDF file includes:**

Supplementary text

Figs. S1 to S7

Tables S1 to S2

References for SI reference citations

## Supplementary Information Text

### Materials and Methods

#### Reagents, chemicals, and cell culture

Sulforaphane (SF), tert-butylhydroquinone (tBHQ), sodium arsenite (As(III)), brusatol, sphingosine-1-phosphate (S1P), and human thrombin (cell culture grade) were purchased from Sigma. Mouse embryonic fibroblasts (MEF) were isolated from wild type, *Nrf2* knockout (*Nrf2*<sup>-/-</sup>), and *Keap1* knockout (*Keap1*<sup>-/-</sup>) mice and cultured with DMEM (Corning) supplemented with 10% FBS (Atlanta Biological), 1% L-glutamine (Invitrogen), 1% Non-Essential Amino Acids (Invitrogen), 0.1% β-mercaptoethanol (Thermo Fisher Scientific), and 1% penicillin/streptomycin (Invitrogen). A549 lung epithelial cancer cells, SKOV3 ovarian adenocarcinoma cells, H1299 non-small cell lung cancer cells, and BEAS-2B lung epithelial cells were purchased from ATCC. Human primary pulmonary artery endothelial cells (HPAEC) were purchased from Lonza. A549, H1299 and SKOV3 cells were grown in DMEM supplemented with 10% FBS and 1% penicillin/streptomycin. BEAS-2B cells were cultured in Ham's F-12 medium supplemented with 1% bovine hypothalamus extract (PromoCell), insulin (2 mg/mL, Sigma), epidermal growth factor (10 μg/mL, Millipore), transferrin (2.5 mg/ml, Sigma-Aldrich), cholera toxin (10 μg/mL, List Biological Laboratories, Inc.) and dexamethasone (0.05 mM, Sigma). HPAEC cells were cultured in complete medium (EBM-2, Lonza). All cells were maintained at 37°C in a humidified incubator containing 5% CO<sub>2</sub>.

#### Generation of *NRF2*<sup>-/-</sup>, *RPA1*<sup>-/-</sup> and *KEAP1*<sup>-/-</sup> cells

*NRF2* knockout (*NRF2*<sup>-/-</sup>), *RPA1* knockout (*RPA1*<sup>-/-</sup>) and *KEAP1* knockout (*KEAP1*<sup>-/-</sup>) cells were generated using CRISPR-Cas9-mediated gene editing. A pair of single guide RNA (sgRNA) sequences was used to target coding sequences near the promoter region of each gene of interest. The sgRNA sequences used were as follows:

*NRF2*: sgRNA-A 5'-TATTTGACTTCAGTCAGCGA-3'

sgRNA-B 5'-TAGTTGTAAGTACTGAGCGAAAA-3'

*RPA1*: sgRNA-A 5'- TGTATCCCCCTTCTGCATGA -3'

sgRNA-B 5'- TCATGCAGAAGGGGGATACA -3'

*KEAP1*: sgRNA-A 5'-AGCGTGCCCCGTAACCGCAT-3'

sgRNA-B 5'- GATCTACACCGCGGGCGGCT-3'

Each sgRNA pair was annealed and then ligated into the pSpCas9(BB)-2A-GFP plasmid. Cells were then cotransfected with 1μg of the pSpCas9(BB)-2A-GFP plasmid carrying sgRNA-A and 1μg of the pSpCas9(BB)-2A-GFP plasmid carrying sgRNA-B. GFP-positive cells were isolated using fluorescence-activated cell sorting (FACS) and subsequently plated at a low confluence for colony formation and isolation. Once colonies were obtained, individual clones were expanded, and their genomic DNA was isolated and successful homozygous knockout of the target genes of interest was confirmed by sequencing. Finally,

generation of *NRF2*<sup>-/-</sup> and *RPA1*<sup>-/-</sup> cell lines was confirmed by detecting loss of protein expression via immunoblot analysis.

### **Recombinant DNA molecules plasmid construction**

The *MYLK* promoter region was synthesized by GenScript (Piscataway, NJ) and cloned into the pGL3-Basic vector (Promega). This region of DNA included 2,535 bp of sequence upstream of the *MYLK* promoter (NM\_053025.3) located on chromosome 3q21, containing 2431 bp of 3' untranslated region, 97 bp of exon 1, and 7 bp of intron 1. To generate promoter deletion constructs, a series of primers was designed to amplify each fragment (2.5 kb: -2428~ +100; 2.2 kb: -2111~ +100; 1.9 kb: -1751~ +100; 1.3 kb: -1211~ +100; 0.9 kb: -831~ +100; 0.4 kb: -271~ +100). In addition, 41 nt, 25 nt, and 11 nt probes containing the ARE region were synthesized by Integrated DNA Technologies and cloned into the pGL4.22-Basic vector (Addgene) using MluI/BglII. The sequences can be found in SI Appendix, Fig. S2 and S3. Flag-tagged RPA1, HA-tagged RPA1 and His-tagged RPA1-full length (FL), domain 1 (D1), domain 2 (D2), and domain 3 (D3) were PCR-amplified using cDNAs reverse-transcribed from the mRNAs of HEK293T cells, then subcloned into the pCMV-Flag-5a vector (EcoRI/BamHI) and pET5b vector (NdeI/BamHI) respectively. The primer sequences are as follow:

FL-Forward 5'-ATGGTCGGCCAACTGAGCGAG-3'

FL-Reverse 5'-TCACATCAATGCACTTCTCCTG-3'

D1-Forward 5'-ATGGTCGGCCAACTGAGCGAG-3'

D1-Reverse 5'-TCACACTTTGGACTGTGTTCC-3'

D2-Forward 5'-GTGCCCATGCGCAGCCTCACTC-3'

D2-Reverse 5'-TCACGGCTTGTCGCCTTGGCCCA-3'

D3-Forward 5'-GACTACTTTAGTTCTGTGGCC-3'

D3-Reverse 5'-TCACATCAATGCACTTCTCCTG-3'

GST-tagged NRF2-wild type (WT), GST-tagged NRF2 Neh1 domain deletion ( $\Delta$ Neh1), HA-tagged NRF2-WT, HA-tagged NRF2 $\Delta$ Neh1, Flag-tagged NRF1/2/3 and His-tagged SMAFG vectors were generated as previously described (1, 2).

### **Transfection of cDNA and luciferase reporter assays**

Transfection of cDNA was performed using Lipofectamine 3000 (Invitrogen) according to the manufacturer's instructions. Luciferase activity was measured using the Dual-luciferase reporter assay system (Promega). For relative luciferase activity analysis, the value of Firefly-luciferase was normalized to the value of *Renilla*-luciferase. In brief,  $1 \times 10^5$  A549 cells/well were seeded into a 24-well plate and cultured for 16 h. 0.45  $\mu$ g of plasmid DNA and 0.05  $\mu$ g of hRluc/TK plasmid were cotransfected. After transfection for 24 h, the cells were treated with different compounds for another 16 h. Cells were then lysed in passive lysis buffer (Promega). Both Firefly and *Renilla* luciferase values were detected using the dual luciferase assay kit

(Promega) and luminometer (Model TD-20/20, Turner BioSystems, CA). Finally, the value of Firefly luciferase was normalized to the value of *Renilla* luciferase to obtain the relative luciferase activity. Values were further normalized to control groups where indicated.

### **mRNA extraction and real-time qRT-PCR analysis**

Total mRNA was extracted using TRIzol (Invitrogen) according to the manufacturer's instructions. cDNA was then synthesized using 2 µg of mRNA and the Transcriptor first-strand cDNA synthesis kit (Promega). Real-time quantitative PCR (qRT-PCR) was then performed. The  $\beta$ -actin gene (*ACTB*) was used for qRT-PCR normalization and all experiments were performed in triplicate. Primer sequences are as follows:

Mouse-*MYLK*-Forward 5'-CCAAGGACCGGATGAAGAAATA-3'  
Mouse -*MYLK*-Reverse 5'-CCCTGAGATCATTGCCATAGAG-3'  
Mouse-*GCLM*-Forward 5'-TGGAGCAGCTGTATCAGTGG-3'  
Mouse-*GCLM*-Reverse 5'-CAAAGGCAGTCAAATCTGGTG-3'  
Mouse-*ACTB*-Forward 5'-AAGGCCAACCGTGAAAAGAT-3'  
Mouse-*ACTB*-Reverse 5'-GTGGTACGACCAGAGGCATAC-3'  
Human-*MYLK*-Forward 5'-CCAAGGACCGGATGAAGAAGTA-3'  
Human-*MYLK*- Reverse 5'-CCCTGAGATCATTGCCATAGAG-3'  
Human-*NRF2*-Forward 5'-ACACGGTCCACAGCTCATC-3'  
Human-*NRF2*- Reverse 5'-TGTC AATCAAATCCATGTCCTG-3'  
Human-*NQO1*-Forward 5'-ATGTATGACAAAGGACCCTTCC-3'  
Human-*NQO1*-Reverse 5'-TCCCTTGCAGAGAGTACATGG-3'  
Human-*GCLM*-Forward 5'-GACAAAACACAGTTGGAACAGC-3'  
Human-*GCLM*-Reverse 5'-CAGTCAAATCTGGTGGCATC-3'  
Human-*RPA1*-Forward 5'- ATACAAACATAAAGCCCATCC-3'  
Human-*RPA1*-Reverse 5'- TTGCCAATCTTCACTCCAAC-3'  
Human-*RASSF10*-Forward 5'-GCAGCAATGGGACAGCAAGA-3'  
Human-*RASSF10*-Reverse 5'-TTCGCACATGGGCAAGGAGT-3'  
Human-*TPD52L1*-Forward 5'-TTACTCCATTCGCCATTCCA-3'  
Human-*TPD52L1*-Reverse 5'-CTGCCTCCATTAGGGTTCGT-3'  
Human-*FAM110B*-Forward 5'-CCCACGCTCAAAGTGTTCCGG-3'  
Human-*FAM110B*-Reverse 5'-AAGGACTCGGCTGACTGCTCC-3'  
Human-*NAV2*-Forward 5'-AGTTGGGAAGCAAGGTGGAG-3'  
Human-*NAV2*-Reverse 5'-GAAATTCAAGCAGGCATCTATGTT-3'  
Human-*PCNX1*-Forward 5'- GCAGCAACTATTAAGGAGATA-3'  
Human-*PCNX1*-Reverse 5'- TCATTGGAGACAAGACGAAA-3'  
Human-*FOCAD*-Forward 5'-CAGTGCCCTGAAAGGTTAGA-3'

Human-*FOCAD*-Reverse 5'-CATCATCGCCTCTGTTGTCT-3'  
Human-*ITGA1*-Forward 5'-TTACCCTGTGCTGTACCCAA-3'  
Human-*ITGA1*-Reverse 5'-TTTCACTCCGAAGTTCTCCC-3'  
Human-*TANC2*-Forward 5'-GATGCTGCTTACTGGTGGGAAAT-3'  
Human-*TANC2*-Reverse 5'-TCACTGGAAGTGGCGGGACA-3'  
Human-*ADGRG5*-Forward 5'-CTGCGGCTCATCTGTATCTACTTC-3'  
Human-*ADGRG5*-Reverse 5'-GTTTCCTGGCTCCCTCCTTC-3'  
Human-*SYT16*-Forward 5'-TGCCTGCGAAGATTTGGATG-3'  
Human-*SYT16*-Reverse 5'-AGATGTGCCGTGGTGTGG-3'  
Human-*CNIH3*-Forward 5'-GTGCTGCCAGAATACTCCAT-3'  
Human-*CNIH3*-Reverse 5'-GAAATACCTCCAGAAGTGATAGAA-3'  
Human-*EEFSEC*-Forward 5'-CCCAGATTTCCATCCCAACG-3'  
Human-*EEFSEC*-Reverse 5'-GGACTTCACCTTCTTCACCACCT-3'  
Human-*ACTB*-Forward 5'-CCCAGAGCAAGAGAGG-3'  
Human-*ACTB*-Reverse 5'-GTCCAGACGCAGGATG-3'

### **Immunoblot (IB), immunofluorescence (IF), and immunohistochemical (IHC) analyses**

IB, IF, and IHC were performed as previously described (3, 4). For IB, cells were harvested in sample buffer (62.5 mM Tris-HCl pH 6.9, 3% SDS, 10% glycerol, 5%  $\beta$ -mercaptoethanol, and 0.1% bromophenol blue). Lysates were boiled, sonicated, and resolved by SDS-PAGE, and then subjected to immunoblot analysis. For IF, the cells were fixed in 4% paraformaldehyde in PBS for 20 min, incubated with 0.2% Triton X-100 for 20 min, and blocked with 5% BSA for 1 h. Then the cells were incubated with Alexa Fluor® 568 phalloidins antibody (1:40, Invitrogen) for 30 min. Images were acquired with a Zeiss Observer.Z1 fluorescent microscope using the Slidebook 4.2.0.11 software (Intelligent Imaging Innovations, Inc.). For IHC, the lung tissues were fixed in 10% buffered neutral formalin in PBS and embedded with paraffin. The embedded tissues were sectioned at a 5  $\mu$ m thickness and then baked and deparaffinized. Sodium citrate buffer (0.01 M, pH=6.0) was used in antigen retrieval, and endogenous peroxidase was blocked with 0.3% H<sub>2</sub>O<sub>2</sub>. The slices were blocked with 5% BSA for 30 min and incubated with primary antibodies overnight at 4 °C. Staining was performed with the EnVision + System-HRP kit (Dako) according to the manufacturer's instructions. Primary antibodies against NRF2 (1:1000 for IB, 1:200 for IHC), MYLK (1:1000 for IB, 1:200 for IHC), KEAP1 (1:1000 for IB), NQO1 (1:1000 for IB), GCLM (1:1000 for IB), sMAF (1:1000 for IB), RPA1 (1:1000 for IB), HA (1:1000 for IB) and glyceraldehyde-3-phosphate dehydrogenase (GAPDH) (1:3000 for IB) were purchased from Santa Cruz Biotechnology. The antibody against Flag (1:2000 for WB) as well as horseradish peroxidase (HRP)-conjugated secondary antibodies (1:3000 for IB) was purchased from Sigma. The Alexa Fluor® 568 phalloidin (1:100 for IF) was purchased from Invitrogen.

### **Transendothelial electrical resistance (TEER)**

TEER measurements were performed using an electric cell-substrate impedance sensing (ECIS) system (Applied Biophysics, Troy, NY). HPAEC were plated in 96 well plates coated with collagen. After adhering to the dish, cells were treated with tBHQ, brusatol, or DMSO for 16 h and ECIS measurements were carried out. Thrombin (1 U/mL) was added to the wells and TEER measurements were obtained. Measurements were pooled and plotted as resistance versus time. Values are indicated as means  $\pm$  SD.

### **Biotinylated-DNA pull-down assay**

Biotinylated-DNA pull-down was performed with streptavidin beads. In brief, cells were lysed in RIPA buffer containing 1 mM DTT, 1 mM phenylmethylsulfonyl fluoride (PMSF), and 1% protease inhibitor cocktail (Sigma). The cell lysates were pre-cleared with streptavidin beads (Invitrogen) and incubated with 2  $\mu$ g biotinylated DNA probes which spanned the ARE containing sequences in the promoter regions of both human *MYLK* and mouse *Myk* (41 bp). The DNA-protein complexes were further pulled down by streptavidin beads and complexes were washed three times, resolved by SDS-PAGE gel electrophoresis, and subjected to immunoblot analysis. The sequences of the 41 bp biotinylated DNA probes are shown in SI Appendix, Fig. S4A.

### **Small interfering RNA transfection**

Human RPA1 siRNA (#5: SI02663696; #6: SI02663703; #9: SI05461946 and #10: SI05461953) and non-targeted control siRNA (SI03650318) were purchased from Qiagen. Hiperfect reagent (Qiagen) was used for siRNA transfection according to the manufacturer's protocol. In brief,  $1 \times 10^5$  A549 cells/well were seeded into a 12-well plate and transfected with siRNA (5 nM) for 72 h. Cells were then used for luciferase assay or qRT-PCR analysis.

### **Chromatin immunoprecipitation assay (ChIP)**

ChIP assay was performed according to the manufacturer's instructions (EZ-CHIPTM, Merck, Germany). In brief, A549 cells were seeded in a 150mm dish, and when they reached 95% confluence DNA-protein complexes were cross-linked by adding 1% formaldehyde in the medium for 10 min. Then, the cells were washed with cold PBS and suspended in 1 mL SDS lysis buffer containing 1 mM PMSF and 1% protease inhibitor cocktail (Sigma). All samples were sonicated for  $9 \times 20$  s on ice, then centrifuged at 15,000 rpm for 30 min at 4°C. The solubilized chromatin (0.1 mL) was diluted with ChIP dilution buffer (0.9 mL) for ChIP assays, and 0.1 mL diluted solubilized chromatin was saved for total chromatin input. The chromatin was pre-cleared with protein G-agarose beads for 1 h at 4 °C and then incubated with 4  $\mu$ g anti-NRF2 antibody (Santa Cruz Biotechnology), or rabbit normal IgG (Santa Cruz Biotechnology) for 16 h at 4 °C with rotation. The cross-linked immunoprecipitates and total chromatin input were reverse cross-linked respectively and the DNA was extracted via ethanol precipitation. Then, 1  $\mu$ L of purified DNA was used for PCR detection

with primers specific for the *MYLK* promoter. For PCR amplification the following primers were used: forward 5'-GTAGATGAGAGGAAGCATCTC-3' and reverse 5'-GAGGTTAACAGCCGTCGATG -3'.

### **Immunoprecipitation analysis**

For endogenous immunoprecipitation, A549 cell lysates were collected in radio-immunoprecipitation assay (RIPA) buffer containing: 10 mM sodium phosphate (pH 8.0), 1% Triton X-100, 150 mM NaCl, 1% sodium deoxycholate, and 0.1% SDS. 1 mM DTT, 1 mM PMSF, and 1% protease inhibitor cocktail (Sigma) were also added to the RIPA buffer. The cell lysates were pre-cleared with 10  $\mu$ L of protein A-agarose beads (Invitrogen) for 1 h, and then incubated with 1  $\mu$ g of antibody and 15  $\mu$ L of protein A-agarose beads on a rotator at 4 °C for 16 h. The immunoprecipitated complexes were washed three times with RIPA buffer and eluted in sample buffer (50 mM Tris-HCl [pH 6.9], 2% SDS, 10% glycerol, 100 mM DTT, 0.1% bromophenol blue) by boiling for 5 min. Samples were then resolved by SDS-PAGE and subjected to immunoblot analysis. For immunoprecipitation of overexpressed proteins, HEK293T cells were transfected with empty vector or vectors expressing HA-NRF2-WT, HA-NRF2 $\Delta$ Neh1, Flag-NRF1/2/3, HA-RPA1 and Flag-RPA1. After 24 h transfection, the cell lysates were collected with RIPA buffer and immunoprecipitated as before.

### ***In vitro* binding assays**

GST-tagged NRF2, His-tagged RPA1-FL/D1/D2/D3 and His-tagged sMAFG proteins were expressed in *Escherichia coli* Rosetta (DE3) LysS cells and purified with glutathione sepharose 4B matrix (Amersham Biosciences) and Ni-IDA Agarose Beads (Qiagen). For the *in vitro* binding assay, the different purified proteins were mixed together and incubated in binding buffer (20 mM Tris-HCl pH 8.0, 1 mM  $\beta$ -mercaptoethanol, 3 mM EDTA, 150 mM Na<sub>2</sub>Cl, 1% NP40, 0.02% Triton X-100, 1 mM DTT, 1 mM PMSF, and 1% protease inhibitor cocktail) in the presence of glutathione beads for 12 h at 4 °C. The beads were then washed six times with washing buffer (20 mM Tris-HCl pH 8.0, 1 mM  $\beta$ -mercaptoethanol, 3 mM EDTA, 150 mM Na<sub>2</sub>Cl, 0.1% NP40, 0.02% Triton X-100, 1 mM DTT, 1 mM PMSF, and 0.1% protease inhibitor cocktail). The proteins were eluted by boiling in sample buffer, resolved by SDS-PAGE, and detected with Coomassie or silver staining, or immunoblot analysis.

### **ARE-NRE site identification and annotation**

All nucleotide sequence iterations that match the ARE-NRE consensus sequence TGABNNNGCAAACCTTCA were generated. These ARE-NRE were mapped to unique genomic loci on GRCh38 reference genome (SI Appendix, Table S1). The ChIPseeker package was used to annotate the identified sites. Unique “candidate genes” harboring an ARE-NRE within the promoter region (defined as  $\leq$ 5 kb upstream of the transcription start site) or within the gene’s first intron were used for later analysis.

Identification of differentially-expressed genes following RPA1 silencing in A549 cells

Total RNA from duplicate samples of A549-*RPA*<sup>+/+</sup>, and two clones of RPA1-/- knockout A549 cells (A549-*RPA*<sup>-/-</sup>-1 and A549-*RPA*<sup>-/-</sup>-2) were isolated using Trizol followed by a column-based RNeasy kit (Qiagen). Ribosomal RNA was depleted using Ribo-Zero Gold rRNA Removal kit (Illumina), and prepared for sequencing using the NEB Ultra Directional RNA library prep kit for Illumina (NEB). Samples were run on HiSeq3000 Illumina Sequencing Platform as 50 bp single-end read runs. Output FASTQ files were mapped to hg38 reference genome using Tophat2. The resulting BAM files were sorted and indexed for downstream analyses, and can be accessed at the National Center for Biotechnology Information BioProject Database number 487650. We utilized an in-house shell script to generate a count matrix of the number of reads assigned to each gene within each sample. Subsequent analyses were conducted in R statistical programming environment. The DESeq2 package was used to identify differentially expressed genes between A549-*RPA*<sup>+/+</sup> and the pooled samples of A549-*RPA*<sup>-/-</sup>-1 and A549-*RPA*<sup>-/-</sup>-2 cells. Briefly, the count matrix was pre-filtered to remove genes that had zero read depth in any cell line. Size factors for normalization and dispersion values for statistical testings were calculated based on the entire transcriptome. Subsequently, the gene list was filtered to only include genes with the ARE-NRE sequence at the promoter or the first intron region (total 55 genes). *p*-value adjustment to correct for multiple testings was performed using the method described by Benjamini-Hochberg.

### **Data transformation for visualization purposes**

Base mean value ( $\mu_b$ ) for a particular gene, as determined by the DESeq2 package, is an average of normalized counts for all samples. It represents the overall sequencing depth for a gene and therefore, gives an idea of the general expression level of that gene. For visualization purposes, these base mean values were logarithmically transformed using the following function  $f(\mu_b) = 10 \ln(10\mu_b)$ . Variance Stabilization Transformation (VST) of read counts is implemented in the DESeq2 package. This transformation derives homoscedastic data from discrete count data for easy interpretation. VST distances presented in the heat map (Fig. 6B), were calculated as control samples mean subtracted VST expression level.

### **Pre-clinical murine model of ventilation-induced lung injury (VILI)**

All mice were handled according to the Guide for the Care and Use of Laboratory Animals, and the protocols were approved by the University of Arizona Institutional Animal Care and Use Committee. Mice received food and water *ad libitum*. Eight-week-old male C57BL/6J *Nrf2*<sup>+/+</sup>;*Mylk*<sup>+/+</sup> (wild type, WT), *Nrf2*<sup>-/-</sup>;*Mylk*<sup>+/+</sup> (*Nrf2*<sup>-/-</sup>), *Nrf2*<sup>+/+</sup>;*Mylk*<sup>-/-</sup> (*Mylk*<sup>-/-</sup>), and *Nrf2*<sup>-/-</sup>;*Mylk*<sup>-/-</sup> mice (25-27g) were randomly allocated to either the control group (N = 3) or VILI group (N = 6). For VILI experiments, mice were subjected to mechanical ventilation. In brief, the mice were anesthetized using ketamine/xylazine (i.p., 100/5 mg/kg, respectively), intubated with a 20-gauge IV catheter, and connected to a ventilator (Inspira, Harvard Apparatus). The ventilation parameters using room air were: respiratory rate = 75 breaths/min, tidal volume



= 40 mL/kg, and a positive and expiratory pressure of 0 cm H<sub>2</sub>O for 4 h. Mice were constantly monitored and deep anesthesia was maintained throughout the whole experiment with ketamine/xylazine. The mice in the control groups were allowed to breathe spontaneously. After the treatments, the mice were euthanized and bronchoalveolar lavage (BAL) fluid was obtained via lung lavage with 1 mL HBSS (Invitrogen) through the tracheal cannula. To collect the cells, the BAL fluid was centrifuged at 500 ×g for 20 min at 4°C, then cell pellets were resuspended in PBS and total cell counts were measured using the TC20 automated cell counter (BioRad). For differential BAL cell counts, cells were concentrated using a Cytospin 4 (Thermo Fisher Scientific) and the slides were stained using the Shandon Kwik-Diff kit (Thermo Fisher Scientific). Macrophages, neutrophils, and lymphocytes were identified using standard morphological criteria; at least 200 cells were examined per sample. The supernatant collected from the BAL fluid was centrifuged at 15,000 ×g for 10 min at 4°C and the levels of IL-6 and TNF-α in each sample were detected with an ELISA kit (Invitrogen) following the manufacturer's instructions. Lungs were collected and divided as follows: two thirds were snap frozen in liquid nitrogen for total RNA extraction and protein assays, the other third was fixed with 10% buffered formalin, then embedded in paraffin for histological and immunohistochemical analyses.

### **Statistical analysis**

Results are presented as mean ± SD for at least three independent experiments. Statistical analysis was performed using SPSS 17.0. Unpaired Student's t-tests were applied to compare the means of two groups. One-way ANOVA with Bonferroni's correction was used to compare the means of three or more groups.  $p < 0.05$  was considered statistically significant.

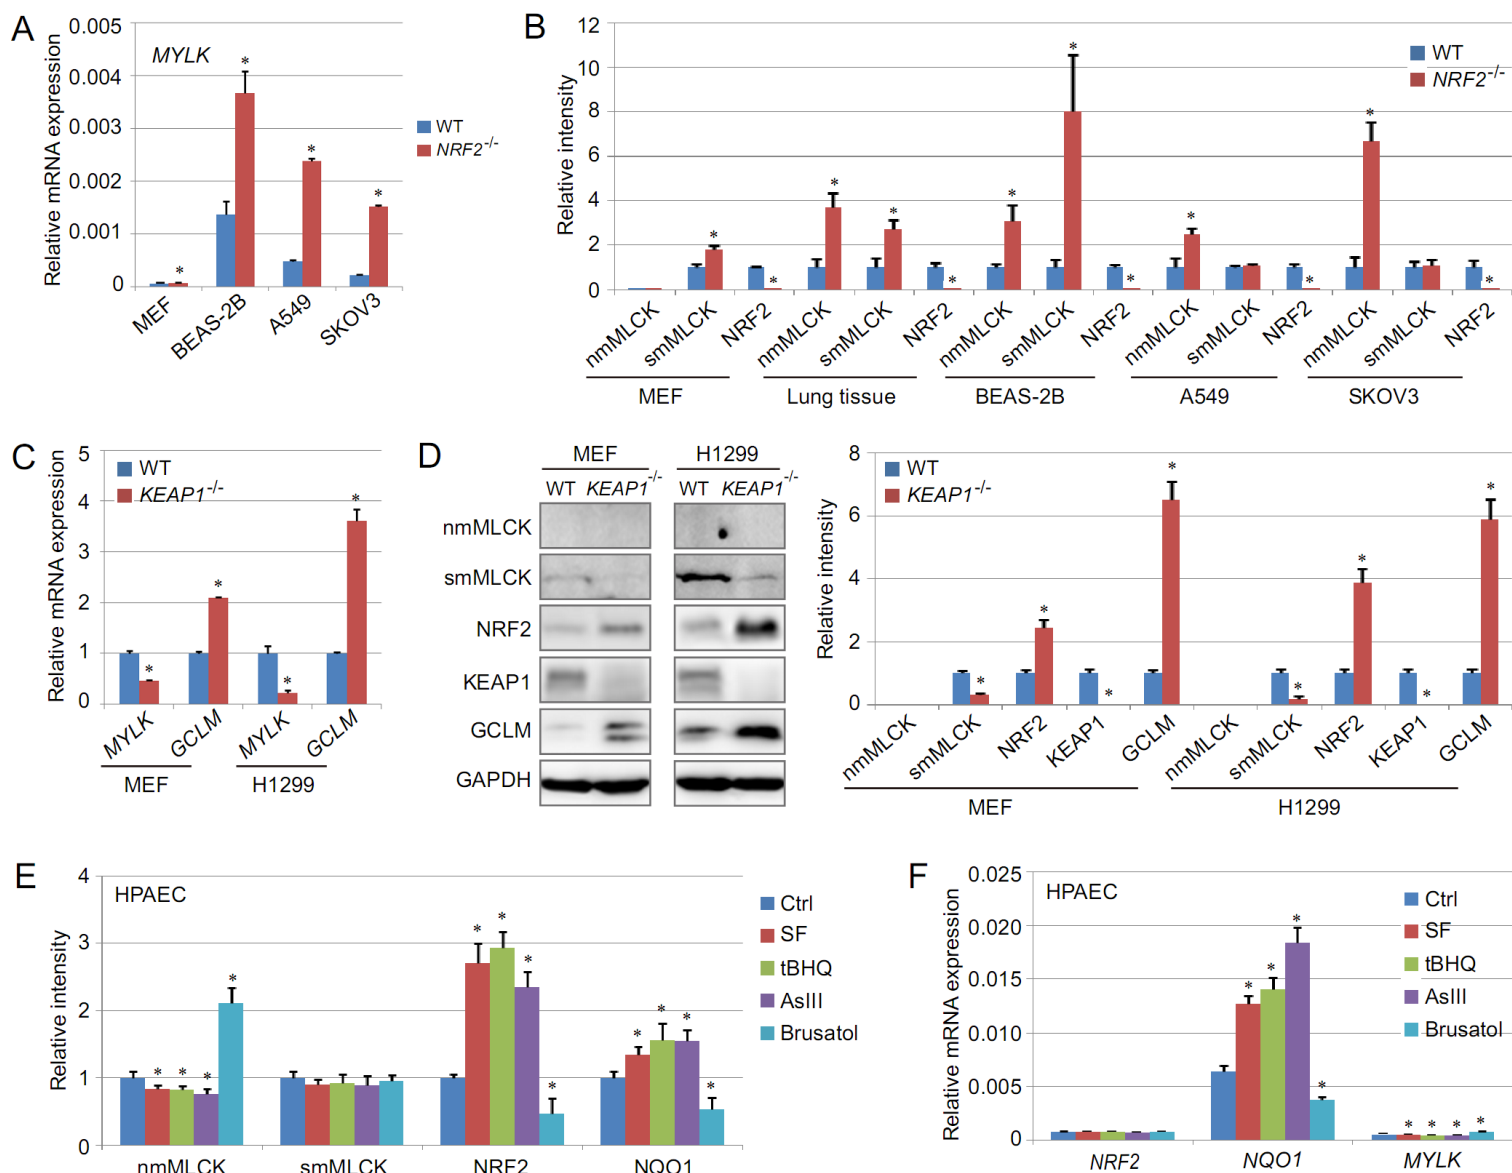

**Fig. S1. NRF2 negatively regulates MYLK expression (Related to Fig. 1).**

(A) Unnormalized results of Fig. 1A. (B) Quantification of immunoblot results in Fig. 1B. (C) qRT-PCR analysis of *MYLK* and *GCLM* expression in WT and *KEAP1*<sup>-/-</sup> cell lines. N = 3. Each gene was normalized to its control (Ctrl). Data are presented as mean ± SD. \*  $p < 0.05$ . (D) Immunoblot analysis of WT and *KEAP1*<sup>-/-</sup> cell lines. Quantification is shown in the right panel, and data are presented as mean ± SD. \*  $p < 0.05$ . (E) Quantification of immunoblot results in Fig. 1C. (F) Unnormalized results of Fig. 1D.

**A** *MYLK*-ARE(41bp): 5'-ATTATTAGAATACCATGATTTTGCAAACTTCAATTAATTA-3'  
*MYLK*-mARE(41bp): 5'-ATTATTAGAATACCAACTTTTTCGAAACTTCAATTAATTA-3'  
*MYLK*-ARE(11bp): 5'-ATGATTTTGC-3'  
*NQO1*-ARE(11bp): 5'-GTGACTCAGCA-3'

**B** *MYLK*-ARE(25bp): 5'-GAATACCATGATTTTGCAAACTTCA-3'  
*MYLK*-mARE(25bp): 5'-GAATACCAACTTTTTCGAAACTTCA-3'  
*MYLK*-ARE-mL(25bp): 5'-GTAAAGCATGATTTTGCAAACTTCA-3'  
*MYLK*-ARE-mR(25bp): 5'-GAATACCATGATTTTGC AATCATGA-3'

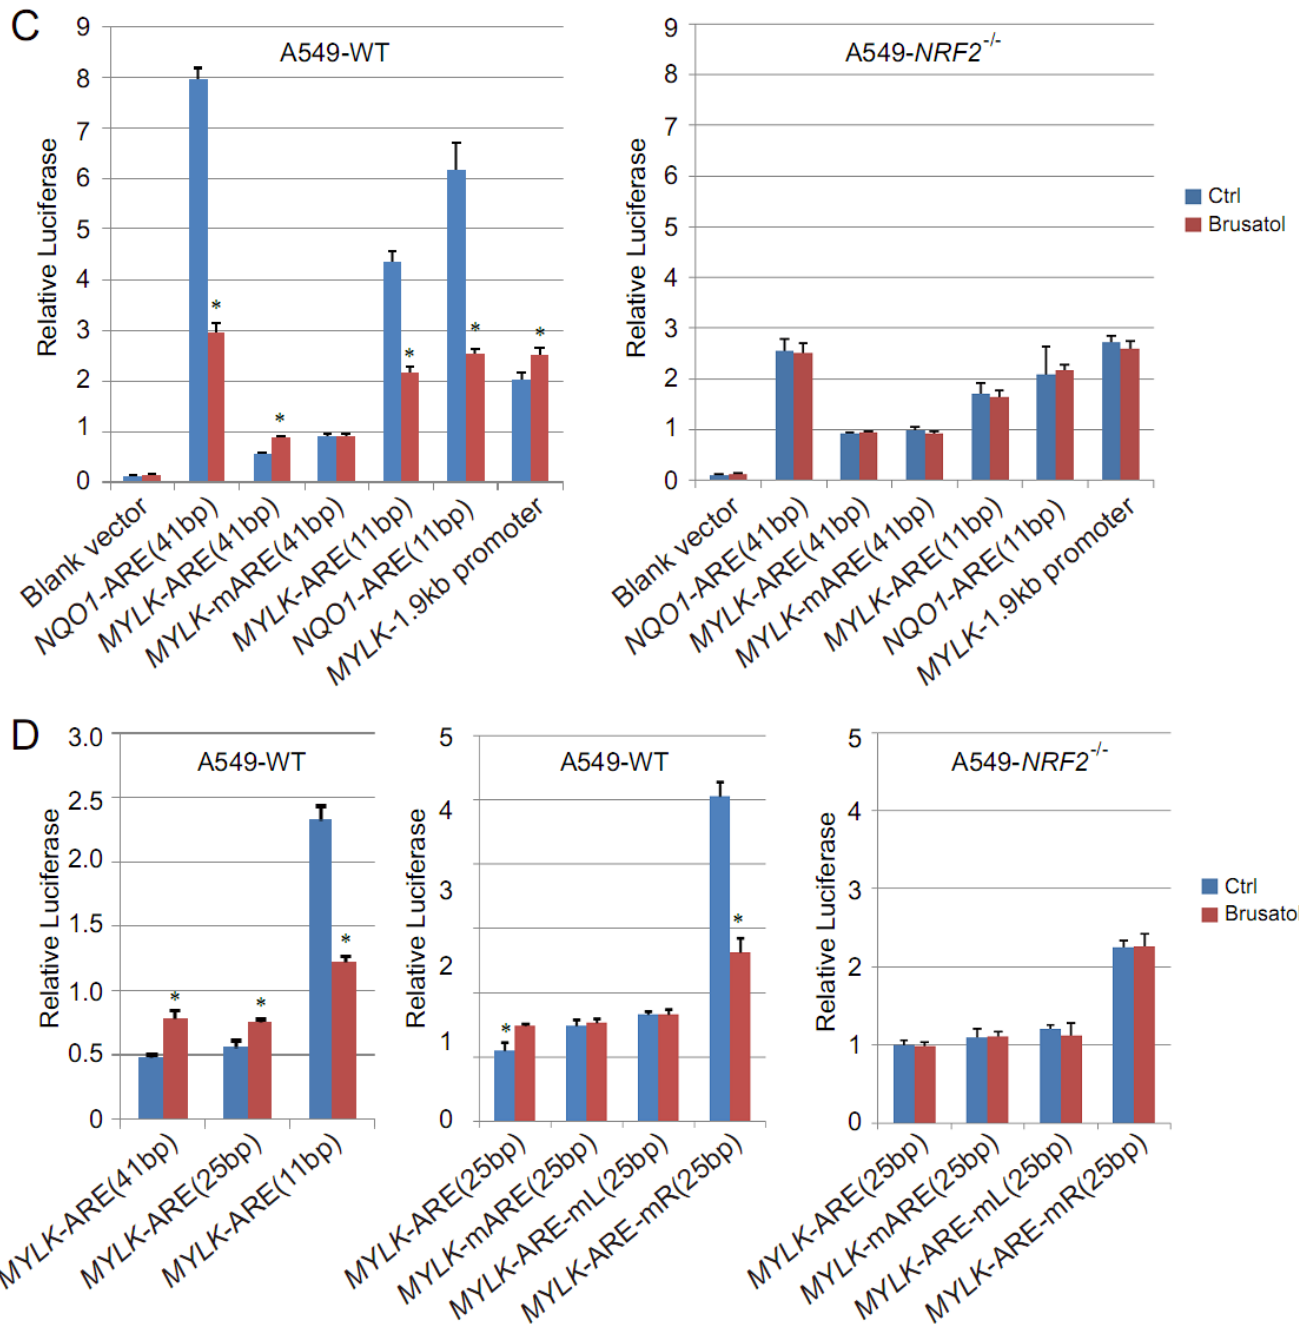

**Fig. S2. An NRF2-RPA Element (NRE) exists adjacent to the *MYLK* ARE. (Related to Fig. 2).**

(A) Sequences of 11 bp core *nmMYLK*-ARE and an extended 41 bp *nmMYLK*-ARE. (B) Sequences of 25 bp *MYLK*-ARE (with 7 bp flanking the 11 bp core ARE), *MYLK*-mARE (mutations in the core ARE), *MYLK*-ARE-mL (5' or "left" flanking mutations), and *MYLK*-ARE-mR (3' or "right" flanking mutations). (C-D) Unnormalized results of Fig. 2D and Fig. 2E.

**A**

*MYLK*-ARE(41bp): 5'-ATTATTAGAATACCCATGATTTTGCAAACTTCAATTAATTAA-3'

*NQO1*-ARE(41bp): 5'-AATCGCAGTCACAGTTGACTCAGCAGAATCTGAGCCTAGGG-3'

*NQO1*-ARE-NRE(41bp): 5'-AATCGCAGTCACAGTTGACTCAGCAAACTTCAAGCCTAGGG-3'

*GCLM*-ARE(41bp): 5'-TTTCCTGGAAGACAATTGACTAAGCAGAAATCGTAGCCGAGA-3'

*GCLM*-ARE-NRE(41bp): 5'-TTTCCTGGAAGACAATTGACTAAGCAAACTTCATAGCCGAGA-3'

*VEGFA*-HRE(41bp): 5'-TGCATTACGTGGGCTCCAACAGGTCCTCTTCCCTCCCAGTCA-3'

*VEGFA*-HRE-NRE(41bp): 5'-TGCATTACGTGGGCTCCAACAGGTCCAACTTCATCCCAGTCA-3'

*TNF $\alpha$* -KB(41bp): 5'-CATGGGTTTCTCCACCAAGGAAGTTTCCGCTGGTTGAATG-3'

*TNF $\alpha$* -KB-NRE(41bp): 5'-CATGGGTTTCTCCACCAAGGAAGTTTAACTTCAGTTGAATG-3'

*CYP1A1*-XRE(41bp): 5'-AGGCGCGGTGCCCAGGCGTTGCGTGAGAAGGACCGGAGGCC-3'

*CYP1A1*-XRE-NRE(41bp): 5'-AGGCGCGGTGCCCAGGCGTTGCGTGAACTTCACCGGAGGCC-3'

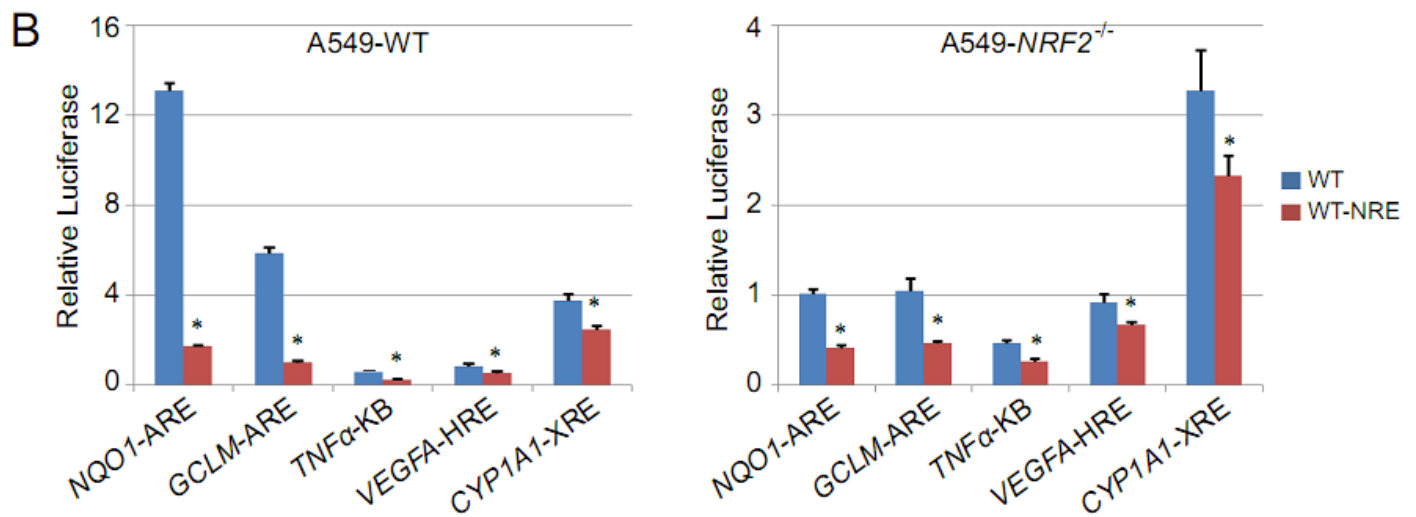

**Fig. S3. NRE-mediated attenuation of *MYLK* transcription is ARE-specific (Related to Fig. 3).**

(A) Sequences of *MYLK*-ARE, *NQO1*-ARE/ARE-NNRS, *GCLM*-ARE/ARE-NNRS, *VEGFA*-HRE/HRE-NNRS, *TNF $\alpha$* - $\kappa$ B/ $\kappa$ B-NNRS and *CYP1A1*-XRE/XRE-NNRS. (B) Unnormalized results of Fig. 3A.

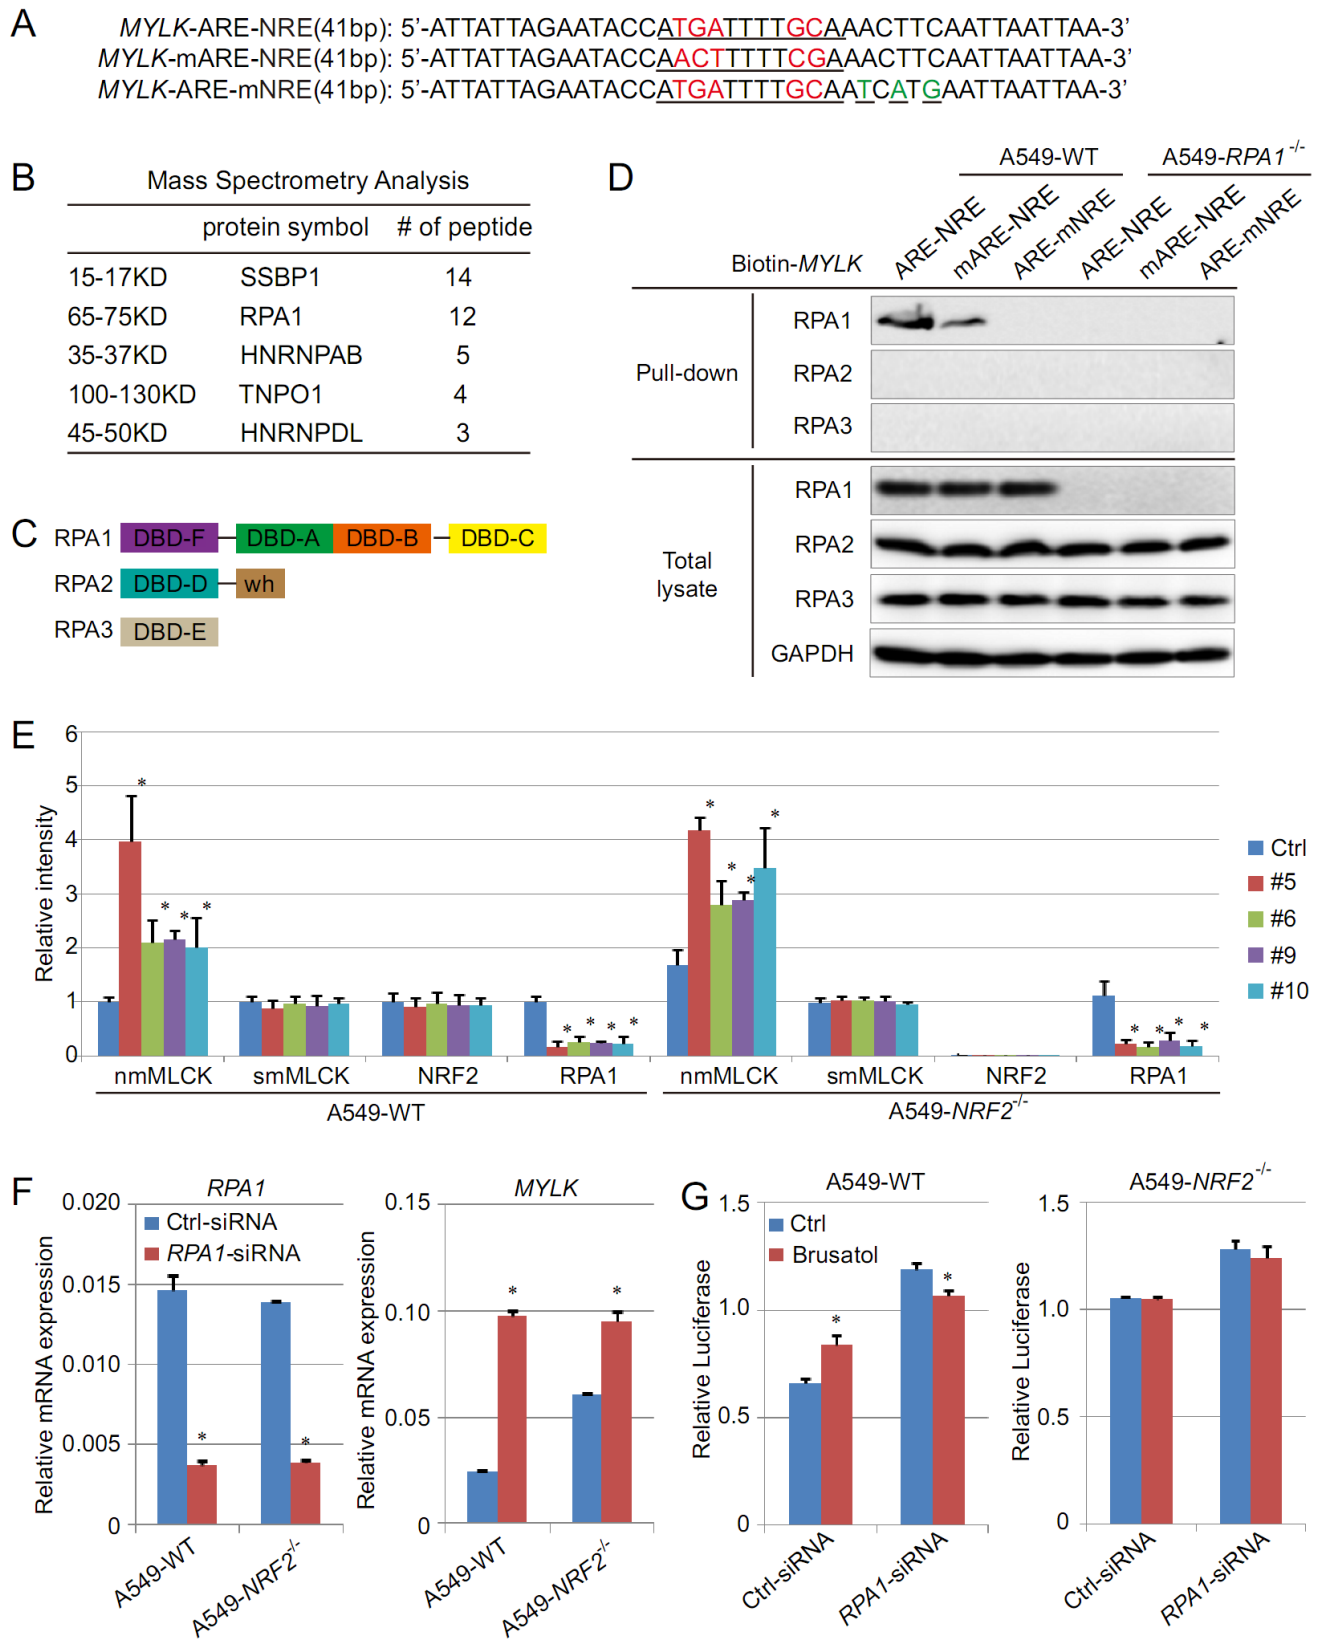

**Fig. S4. Involvement of RPA1-NRE binding in repression of *MYLK* transcription (Related to Fig. 4).**

(A) Sequence of biotinylated 41 bp double-stranded probes of *MYLK*-ARE-NNRS (wild type), *MYLK*-mARE-NNRS (mutation in ARE), and *MYLK*-ARE-mNNRS (mutation in NNRS). (B) The potential candidates identified by mass spectrometry. (C) Domain map of RPA1, RPA2 and RPA3. (D) Immunoblotting of biotinylated dsDNA probe pull-down of A549 WT and *RPA1*<sup>-/-</sup> cell lysates. (E) Quantification of immunoblot results in Fig. 4C. (F-G) Unnormalized results of Fig. 4D and Fig. 4E.

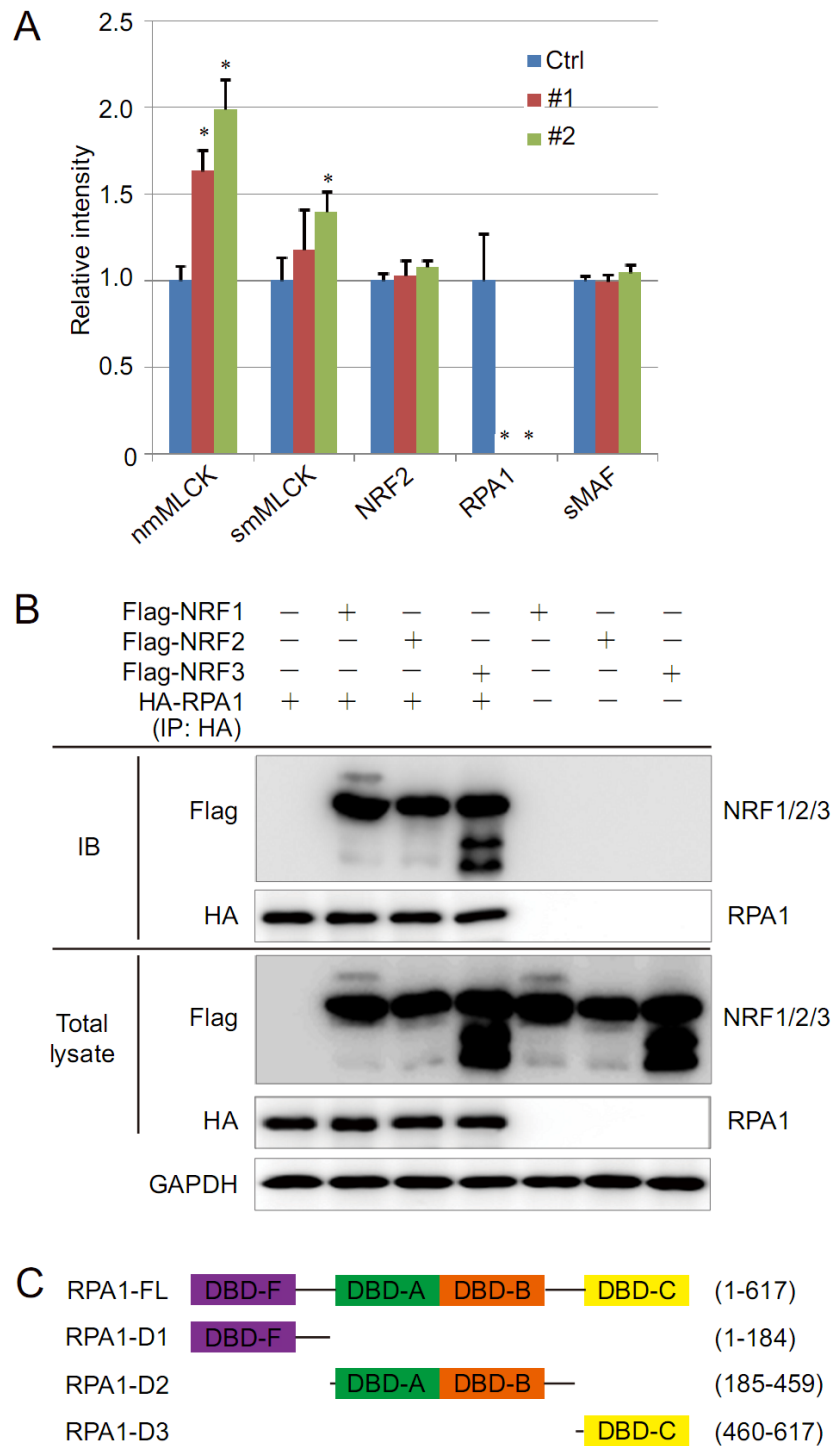

**Fig. S5. RPA1 competes with sMAF to directly bind NRF2 (Related to Fig. 5).**

(A) Quantification of immunoblot results in Fig. 5A. (B) Immunoprecipitation assay of HEK293 cells transfected with HA-tagged RPA1 and Flag-NRF1/2/3. (C) Domain map of RPA1-Full Length (FL), Domain 1 (D1), Domain 2 (D2), and Domain 3 (D3). The length of each respective peptide chain is shown on the right.

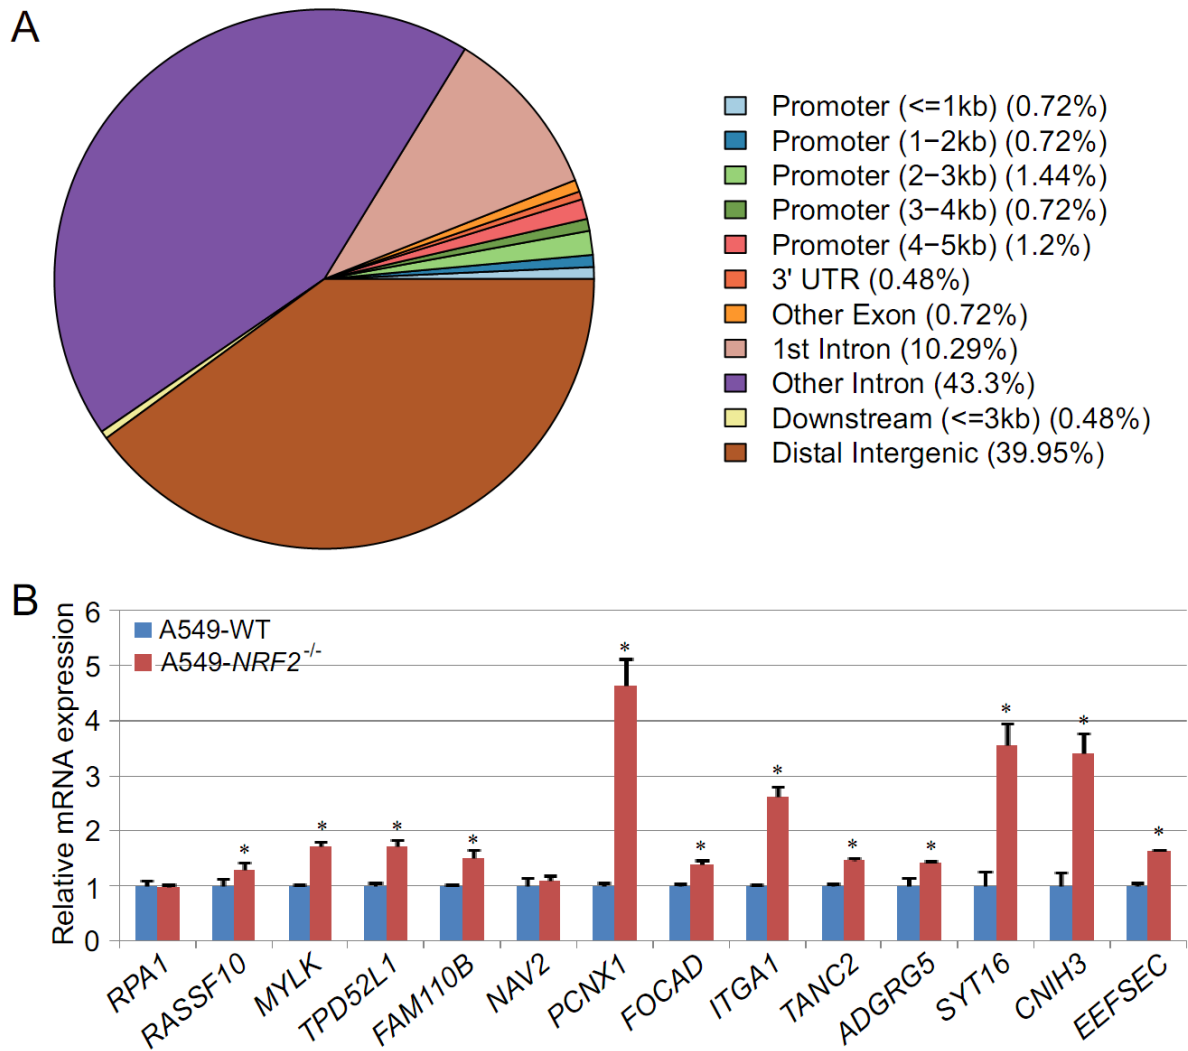

**Fig. S6. NRF2-mediated negative transcriptional regulation is a fundamental mechanism controlling the expression of other genes (Related to Fig. 6).**

(A) The location of the identified loci in SI Appendix Table S1. (B) qRT-PCR analysis of candidate gene mRNA expression in A549-WT and A549-NRF2<sup>-/-</sup> cells. N = 3. Data are presented as mean  $\pm$  SD. \*  $p < 0.05$ .

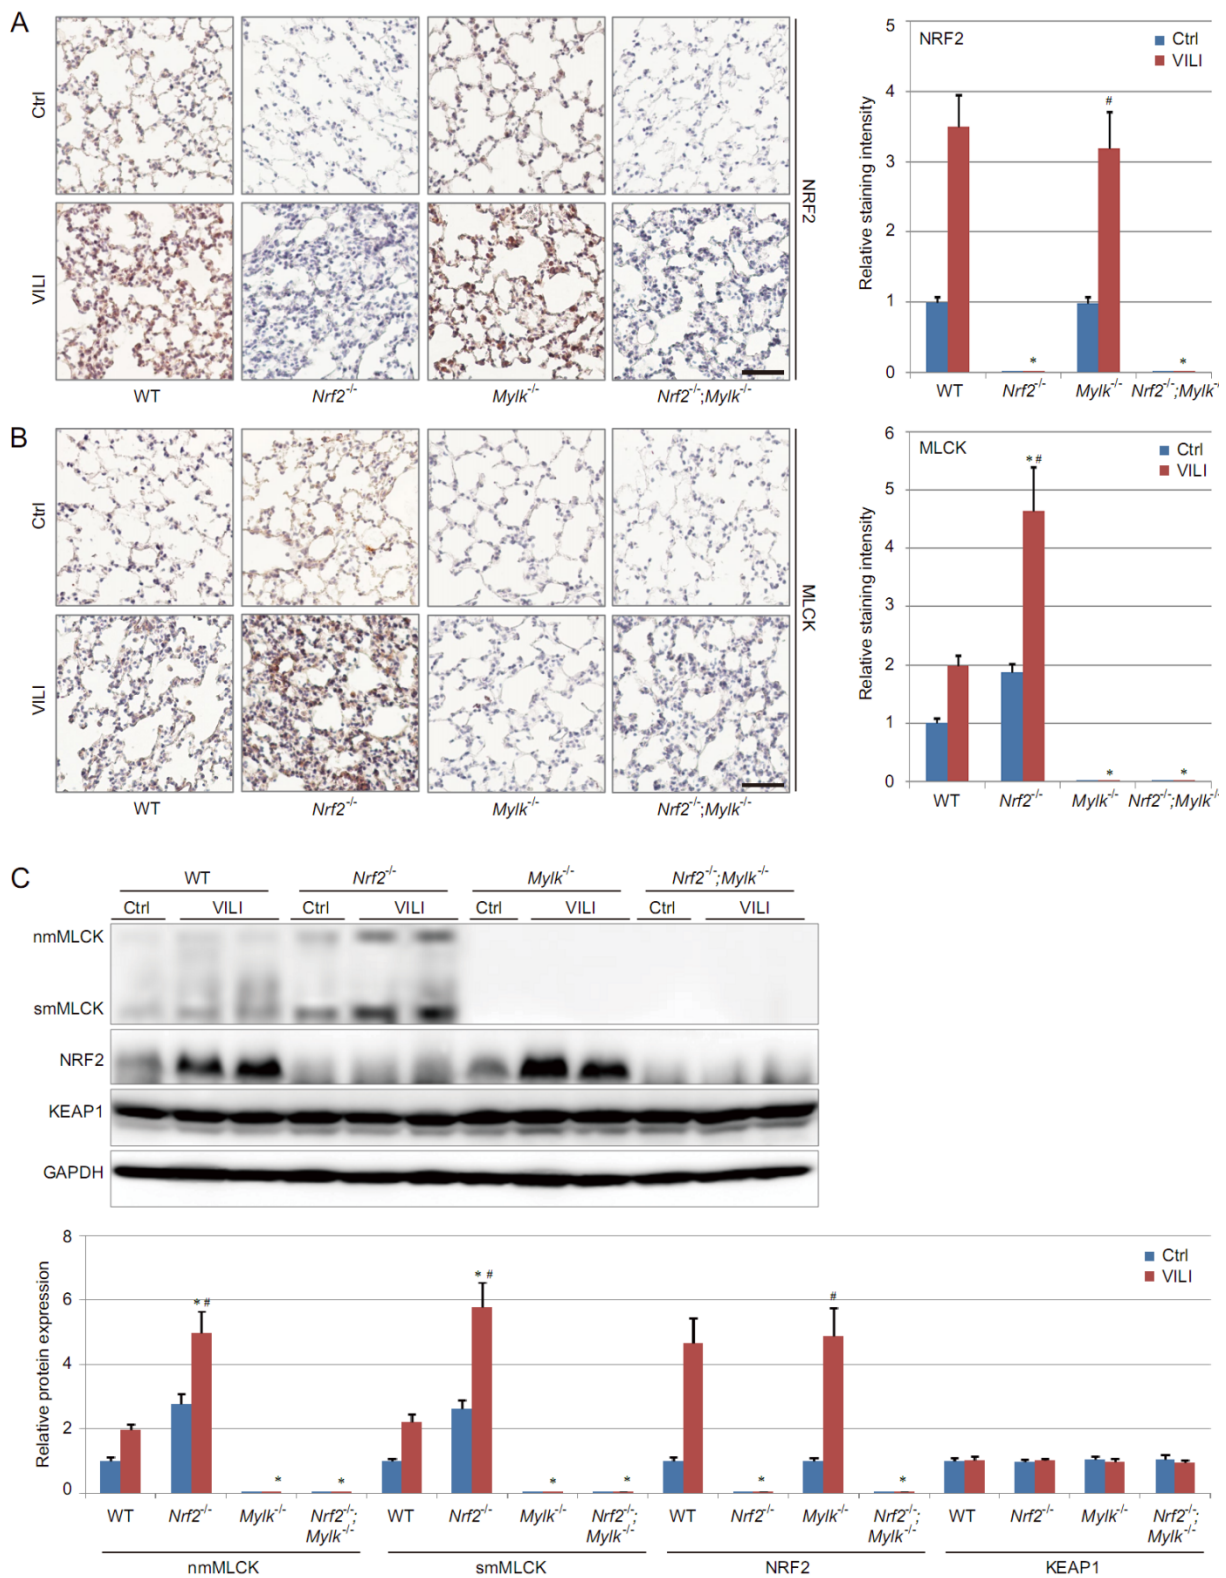

**Fig. S7. NRF2-driven repression of MYLK expression attenuates inflammatory lung injury (Related to Fig. 7).**

(A-B) Immunohistochemistry (IHC) of NRF2 and nmMLCK in lung tissue sections from control (Ctrl, N = 3) and VILI mice (N = 6). Scale bar = 50  $\mu$ m. Quantification is shown on the right panel.

(C) Immunoblot detection of nmMLCK and smMLCK in lung tissues. A representative image (Ctrl group: n=1; VILI group: n =2) of the lung tissue from each group is shown first, followed by the relative quantification of total immunoblot results (Ctrl group: n=3; VILI group: n = 6).



**Table S1. The 428 unique genomic loci containing the exact ARE-NNRS consensus sequence derived from the nmMYLK promoter (TGABNNNGCAAACCTTCA) (Related to Fig. 6).**

|       | Start     | End       | predicted site sequence |   |
|-------|-----------|-----------|-------------------------|---|
| chr4  | 155339372 | 155339389 | GTGACAAAGCAAACCTTCA     | + |
| chr10 | 110549957 | 110549974 | GTGACAAAGCAAACCTTCA     | - |
| chr10 | 17902864  | 17902881  | CTGACAAAGCAAACCTTCA     | - |
| chr7  | 120146259 | 120146276 | TTGATAAAGCAAACCTTCA     | - |
| chr14 | 78894141  | 78894158  | TTGATAAAGCAAACCTTCA     | - |
| chr21 | 16900814  | 16900831  | TTGATAAAGCAAACCTTCA     | - |
| chr5  | 155360389 | 155360406 | TTGATTAAGCAAACCTTCA     | - |
| chrX  | 99028605  | 99028622  | ATGATGAAGCAAACCTTCA     | + |
| chr9  | 8999267   | 8999284   | TTGATGAAGCAAACCTTCA     | + |
| chr12 | 62412374  | 62412391  | TTGATGAAGCAAACCTTCA     | - |
| chr1  | 198639790 | 198639807 | TTGAGGAAGCAAACCTTCA     | - |
| chr3  | 115357115 | 115357132 | TTGAGGAAGCAAACCTTCA     | - |
| chr6  | 138232839 | 138232856 | TTGAGCAAGCAAACCTTCA     | - |
| chr5  | 27711727  | 27711744  | TTGACATAGCAAACCTTCA     | + |
| chr2  | 44251528  | 44251545  | ATGATATAGCAAACCTTCA     | + |
| chr5  | 117478945 | 117478962 | TTGATATAGCAAACCTTCA     | + |
| chr10 | 120623397 | 120623414 | TTGATATAGCAAACCTTCA     | + |
| chr2  | 133058872 | 133058889 | CTGATATAGCAAACCTTCA     | + |
| chr6  | 75947425  | 75947442  | CTGACTTAGCAAACCTTCA     | + |
| chr12 | 53611503  | 53611520  | ATGAGTTAGCAAACCTTCA     | + |
| chr2  | 96363018  | 96363035  | TTGATGTAGCAAACCTTCA     | + |
| chr6  | 70620583  | 70620600  | TTGATGTAGCAAACCTTCA     | + |
| chr7  | 93714658  | 93714675  | TTGATGTAGCAAACCTTCA     | + |
| chr8  | 66913019  | 66913036  | TTGATGTAGCAAACCTTCA     | + |
| chr13 | 105358156 | 105358173 | TTGATGTAGCAAACCTTCA     | + |
| chr15 | 43142491  | 43142508  | TTGATGTAGCAAACCTTCA     | + |
| chr9  | 14038334  | 14038351  | TTGATGTAGCAAACCTTCA     | - |
| chr13 | 79530451  | 79530468  | TTGATGTAGCAAACCTTCA     | - |
| chr15 | 80227863  | 80227880  | TTGATGTAGCAAACCTTCA     | - |
| chr20 | 19173616  | 19173633  | TTGATGTAGCAAACCTTCA     | - |
| chr2  | 224376172 | 224376189 | CTGATGTAGCAAACCTTCA     | + |
| chr9  | 39353073  | 39353090  | CTGATGTAGCAAACCTTCA     | + |
| chr9  | 42181007  | 42181024  | CTGATGTAGCAAACCTTCA     | + |
| chr9  | 60911756  | 60911773  | CTGATGTAGCAAACCTTCA     | + |
| chr9  | 61187382  | 61187399  | CTGATGTAGCAAACCTTCA     | + |
| chr9  | 66995187  | 66995204  | CTGATGTAGCAAACCTTCA     | - |
| chr4  | 168800733 | 168800750 | ATGACCTAGCAAACCTTCA     | + |

|                         |           |           |                     |   |
|-------------------------|-----------|-----------|---------------------|---|
| chr4                    | 157108839 | 157108856 | TTGATCTAGCAAACCTTCA | + |
| chr17                   | 61740920  | 61740937  | ATGATAGAGCAAACCTTCA | - |
| chr4                    | 167354944 | 167354961 | GTGATAGAGCAAACCTTCA | - |
| chr16                   | 63113132  | 63113149  | ATGAGAGAGCAAACCTTCA | + |
| chr3                    | 27157775  | 27157792  | TTGATTGAGCAAACCTTCA | + |
| chr13                   | 40764746  | 40764763  | ATGAGTGAGCAAACCTTCA | + |
| chr13                   | 52187621  | 52187638  | ATGAGTGAGCAAACCTTCA | + |
| chr1                    | 84778707  | 84778724  | GTGAGTGAGCAAACCTTCA | + |
| chr9                    | 15701482  | 15701499  | CTGACGGAGCAAACCTTCA | - |
| chr7                    | 70175548  | 70175565  | TTGATGGAGCAAACCTTCA | + |
| chr8                    | 9036293   | 9036310   | TTGATGGAGCAAACCTTCA | + |
| chrX                    | 73204693  | 73204710  | TTGATGGAGCAAACCTTCA | + |
| chr14                   | 50654128  | 50654145  | TTGATGGAGCAAACCTTCA | - |
| chr3                    | 64425429  | 64425446  | GTGAGGGAGCAAACCTTCA | + |
| chr9                    | 19793254  | 19793271  | ATGACACAGCAAACCTTCA | - |
| chr3                    | 75758613  | 75758630  | TTGACACAGCAAACCTTCA | + |
| chr4                    | 49604595  | 49604612  | TTGACACAGCAAACCTTCA | + |
| chr14                   | 53722746  | 53722763  | TTGACACAGCAAACCTTCA | + |
| chr21                   | 9105546   | 9105563   | TTGACACAGCAAACCTTCA | + |
| chr22                   | 11943455  | 11943472  | TTGACACAGCAAACCTTCA | + |
| chr22                   | 12785145  | 12785162  | TTGACACAGCAAACCTTCA | + |
| chr1_KI270707v1_random  | 10247     | 10264     | TTGACACAGCAAACCTTCA | + |
| chr3_GL000221v1_random  | 49494     | 49511     | TTGACACAGCAAACCTTCA | + |
| chr14_GL000009v2_random | 100798    | 100815    | TTGACACAGCAAACCTTCA | + |
| chr14_GL000194v1_random | 90869     | 90886     | TTGACACAGCAAACCTTCA | + |
| chrUn_KI270742v1        | 79447     | 79464     | TTGACACAGCAAACCTTCA | + |
| chrUn_GL000218v1        | 73233     | 73250     | TTGACACAGCAAACCTTCA | + |
| chr4                    | 49192153  | 49192170  | TTGACACAGCAAACCTTCA | - |
| chr21                   | 8789405   | 8789422   | TTGACACAGCAAACCTTCA | - |
| chr21                   | 9355550   | 9355567   | TTGACACAGCAAACCTTCA | - |
| chr22                   | 11449053  | 11449070  | TTGACACAGCAAACCTTCA | - |
| chr1_KI270706v1_random  | 29777     | 29794     | TTGACACAGCAAACCTTCA | - |
| chr1_KI270708v1_random  | 65464     | 65481     | TTGACACAGCAAACCTTCA | - |
| chr4_GL000008v2_random  | 113248    | 113265    | TTGACACAGCAAACCTTCA | - |
| chrUn_GL000224v1        | 31126     | 31143     | TTGACACAGCAAACCTTCA | - |
| chrUn_KI270743v1        | 98130     | 98147     | TTGACACAGCAAACCTTCA | - |
| chr3                    | 151983716 | 151983733 | GTGACACAGCAAACCTTCA | - |
| chr10                   | 74237064  | 74237081  | CTGACACAGCAAACCTTCA | - |
| chr14_KI270722v1_random | 98433     | 98450     | CTGACACAGCAAACCTTCA | - |
| chr11                   | 43238321  | 43238338  | TTGATACAGCAAACCTTCA | + |
| chr13                   | 37402403  | 37402420  | TTGATACAGCAAACCTTCA | + |
| chrX                    | 146005958 | 146005975 | TTGATACAGCAAACCTTCA | + |

|       |           |           |                     |   |
|-------|-----------|-----------|---------------------|---|
| chr6  | 81415595  | 81415612  | TTGATACAGCAAACCTTCA | - |
| chr13 | 57849447  | 57849464  | TTGATACAGCAAACCTTCA | - |
| chrX  | 111475648 | 111475665 | TTGATACAGCAAACCTTCA | - |
| chr1  | 96127222  | 96127239  | CTGATACAGCAAACCTTCA | + |
| chr14 | 30326425  | 30326442  | CTGATACAGCAAACCTTCA | + |
| chr15 | 48164639  | 48164656  | CTGATACAGCAAACCTTCA | + |
| chr5  | 161540060 | 161540077 | CTGATACAGCAAACCTTCA | - |
| chr8  | 98530644  | 98530661  | CTGATACAGCAAACCTTCA | - |
| chr1  | 185165170 | 185165187 | ATGAGACAGCAAACCTTCA | - |
| chr15 | 86917022  | 86917039  | TTGAGTCAGCAAACCTTCA | + |
| chr3  | 43309442  | 43309459  | ATGATGCAGCAAACCTTCA | + |
| chr6  | 79316974  | 79316991  | ATGATGCAGCAAACCTTCA | - |
| chr1  | 57785945  | 57785962  | TTGATGCAGCAAACCTTCA | + |
| chr1  | 177260551 | 177260568 | TTGATGCAGCAAACCTTCA | + |
| chr2  | 5210473   | 5210490   | TTGATGCAGCAAACCTTCA | + |
| chr2  | 12992906  | 12992923  | TTGATGCAGCAAACCTTCA | + |
| chr2  | 161024631 | 161024648 | TTGATGCAGCAAACCTTCA | + |
| chr2  | 180813950 | 180813967 | TTGATGCAGCAAACCTTCA | + |
| chr2  | 194875966 | 194875983 | TTGATGCAGCAAACCTTCA | + |
| chr2  | 202702067 | 202702084 | TTGATGCAGCAAACCTTCA | + |
| chr2  | 237838054 | 237838071 | TTGATGCAGCAAACCTTCA | + |
| chr3  | 37037456  | 37037473  | TTGATGCAGCAAACCTTCA | + |
| chr3  | 154242734 | 154242751 | TTGATGCAGCAAACCTTCA | + |
| chr3  | 191045411 | 191045428 | TTGATGCAGCAAACCTTCA | + |
| chr4  | 4453286   | 4453303   | TTGATGCAGCAAACCTTCA | + |
| chr4  | 17456080  | 17456097  | TTGATGCAGCAAACCTTCA | + |
| chr4  | 117847457 | 117847474 | TTGATGCAGCAAACCTTCA | + |
| chr4  | 120846317 | 120846334 | TTGATGCAGCAAACCTTCA | + |
| chr4  | 156881099 | 156881116 | TTGATGCAGCAAACCTTCA | + |
| chr4  | 158440483 | 158440500 | TTGATGCAGCAAACCTTCA | + |
| chr4  | 161627179 | 161627196 | TTGATGCAGCAAACCTTCA | + |
| chr5  | 33209237  | 33209254  | TTGATGCAGCAAACCTTCA | + |
| chr5  | 92161723  | 92161740  | TTGATGCAGCAAACCTTCA | + |
| chr5  | 166190974 | 166190991 | TTGATGCAGCAAACCTTCA | + |
| chr6  | 70519531  | 70519548  | TTGATGCAGCAAACCTTCA | + |
| chr6  | 125153282 | 125153299 | TTGATGCAGCAAACCTTCA | + |
| chr6  | 131222883 | 131222900 | TTGATGCAGCAAACCTTCA | + |
| chr8  | 92448438  | 92448455  | TTGATGCAGCAAACCTTCA | + |
| chr8  | 116860424 | 116860441 | TTGATGCAGCAAACCTTCA | + |
| chr9  | 36920339  | 36920356  | TTGATGCAGCAAACCTTCA | + |
| chr10 | 75309390  | 75309407  | TTGATGCAGCAAACCTTCA | + |
| chr10 | 105456402 | 105456419 | TTGATGCAGCAAACCTTCA | + |

|       |           |           |                     |   |
|-------|-----------|-----------|---------------------|---|
| chr11 | 13071304  | 13071321  | TTGATGCAGCAAACCTTCA | + |
| chr12 | 79255152  | 79255169  | TTGATGCAGCAAACCTTCA | + |
| chr12 | 125732049 | 125732066 | TTGATGCAGCAAACCTTCA | + |
| chr14 | 22763552  | 22763569  | TTGATGCAGCAAACCTTCA | + |
| chr14 | 46396328  | 46396345  | TTGATGCAGCAAACCTTCA | + |
| chr16 | 25671659  | 25671676  | TTGATGCAGCAAACCTTCA | + |
| chr17 | 55292277  | 55292294  | TTGATGCAGCAAACCTTCA | + |
| chr20 | 60710758  | 60710775  | TTGATGCAGCAAACCTTCA | + |
| chr1  | 28826775  | 28826792  | TTGATGCAGCAAACCTTCA | - |
| chr1  | 56278385  | 56278402  | TTGATGCAGCAAACCTTCA | - |
| chr1  | 161990703 | 161990720 | TTGATGCAGCAAACCTTCA | - |
| chr2  | 182468153 | 182468170 | TTGATGCAGCAAACCTTCA | - |
| chr3  | 24466916  | 24466933  | TTGATGCAGCAAACCTTCA | - |
| chr3  | 136414172 | 136414189 | TTGATGCAGCAAACCTTCA | - |
| chr4  | 99872526  | 99872543  | TTGATGCAGCAAACCTTCA | - |
| chr4  | 106146774 | 106146791 | TTGATGCAGCAAACCTTCA | - |
| chr4  | 141033044 | 141033061 | TTGATGCAGCAAACCTTCA | - |
| chr4  | 165791828 | 165791845 | TTGATGCAGCAAACCTTCA | - |
| chr4  | 187309987 | 187310004 | TTGATGCAGCAAACCTTCA | - |
| chr5  | 35593583  | 35593600  | TTGATGCAGCAAACCTTCA | - |
| chr5  | 62559190  | 62559207  | TTGATGCAGCAAACCTTCA | - |
| chr5  | 78313911  | 78313928  | TTGATGCAGCAAACCTTCA | - |
| chr5  | 87063440  | 87063457  | TTGATGCAGCAAACCTTCA | - |
| chr5  | 118870746 | 118870763 | TTGATGCAGCAAACCTTCA | - |
| chr6  | 23528735  | 23528752  | TTGATGCAGCAAACCTTCA | - |
| chr6  | 37913170  | 37913187  | TTGATGCAGCAAACCTTCA | - |
| chr6  | 47506886  | 47506903  | TTGATGCAGCAAACCTTCA | - |
| chr6  | 103811986 | 103812003 | TTGATGCAGCAAACCTTCA | - |
| chr6  | 112737464 | 112737481 | TTGATGCAGCAAACCTTCA | - |
| chr6  | 167536013 | 167536030 | TTGATGCAGCAAACCTTCA | - |
| chr7  | 17118658  | 17118675  | TTGATGCAGCAAACCTTCA | - |
| chr7  | 106621191 | 106621208 | TTGATGCAGCAAACCTTCA | - |
| chr7  | 125106037 | 125106054 | TTGATGCAGCAAACCTTCA | - |
| chr7  | 130117330 | 130117347 | TTGATGCAGCAAACCTTCA | - |
| chr7  | 138592231 | 138592248 | TTGATGCAGCAAACCTTCA | - |
| chr8  | 18858465  | 18858482  | TTGATGCAGCAAACCTTCA | - |
| chr8  | 58002927  | 58002944  | TTGATGCAGCAAACCTTCA | - |
| chr9  | 20653597  | 20653614  | TTGATGCAGCAAACCTTCA | - |
| chr9  | 74960803  | 74960820  | TTGATGCAGCAAACCTTCA | - |
| chr10 | 126653214 | 126653231 | TTGATGCAGCAAACCTTCA | - |
| chr12 | 1175242   | 1175259   | TTGATGCAGCAAACCTTCA | - |
| chr12 | 42494259  | 42494276  | TTGATGCAGCAAACCTTCA | - |

|       |           |           |                     |   |
|-------|-----------|-----------|---------------------|---|
| chr12 | 44066828  | 44066845  | TTGATGCAGCAAACCTTCA | - |
| chr12 | 132627849 | 132627866 | TTGATGCAGCAAACCTTCA | - |
| chr13 | 84325016  | 84325033  | TTGATGCAGCAAACCTTCA | - |
| chr14 | 47013096  | 47013113  | TTGATGCAGCAAACCTTCA | - |
| chr15 | 95693482  | 95693499  | TTGATGCAGCAAACCTTCA | - |
| chr18 | 12443429  | 12443446  | TTGATGCAGCAAACCTTCA | - |
| chr18 | 61104347  | 61104364  | TTGATGCAGCAAACCTTCA | - |
| chr20 | 9396983   | 9397000   | TTGATGCAGCAAACCTTCA | - |
| chrX  | 138679821 | 138679838 | TTGATGCAGCAAACCTTCA | - |
| chr7  | 139686912 | 139686929 | GTGATGCAGCAAACCTTCA | + |
| chr19 | 43711241  | 43711258  | GTGATGCAGCAAACCTTCA | - |
| chr1  | 58331537  | 58331554  | CTGATGCAGCAAACCTTCA | + |
| chr2  | 9600758   | 9600775   | CTGATGCAGCAAACCTTCA | + |
| chr3  | 162261957 | 162261974 | CTGATGCAGCAAACCTTCA | + |
| chr4  | 2474704   | 2474721   | CTGATGCAGCAAACCTTCA | + |
| chr9  | 12399986  | 12400003  | CTGATGCAGCAAACCTTCA | + |
| chr11 | 30335481  | 30335498  | CTGATGCAGCAAACCTTCA | + |
| chr11 | 89353296  | 89353313  | CTGATGCAGCAAACCTTCA | + |
| chr12 | 60635359  | 60635376  | CTGATGCAGCAAACCTTCA | + |
| chr2  | 148686037 | 148686054 | CTGATGCAGCAAACCTTCA | - |
| chr3  | 44264604  | 44264621  | CTGATGCAGCAAACCTTCA | - |
| chr3  | 173439909 | 173439926 | CTGATGCAGCAAACCTTCA | - |
| chr6  | 28424430  | 28424447  | CTGATGCAGCAAACCTTCA | - |
| chr9  | 84088167  | 84088184  | CTGATGCAGCAAACCTTCA | - |
| chr11 | 49352905  | 49352922  | CTGATGCAGCAAACCTTCA | - |
| chr11 | 101043044 | 101043061 | CTGATGCAGCAAACCTTCA | - |
| chr11 | 107994657 | 107994674 | CTGATGCAGCAAACCTTCA | - |
| chr18 | 9390624   | 9390641   | CTGATGCAGCAAACCTTCA | - |
| chrX  | 38944286  | 38944303  | TTGATCCAGCAAACCTTCA | + |
| chr10 | 4432554   | 4432571   | TTGAGCCAGCAAACCTTCA | - |
| chr13 | 67737498  | 67737515  | TTGACAATGCAAACCTTCA | + |
| chr14 | 25089497  | 25089514  | GTGACAATGCAAACCTTCA | - |
| chrX  | 9936793   | 9936810   | ATGATAATGCAAACCTTCA | - |
| chr5  | 109677318 | 109677335 | CTGATAATGCAAACCTTCA | + |
| chr12 | 87038540  | 87038557  | ATGACTATGCAAACCTTCA | + |
| chr1  | 87237617  | 87237634  | TTGACTATGCAAACCTTCA | - |
| chr6  | 151616131 | 151616148 | ATGATGATGCAAACCTTCA | - |
| chr6  | 56883584  | 56883601  | TTGATGATGCAAACCTTCA | + |
| chr2  | 40005140  | 40005157  | GTGATGATGCAAACCTTCA | + |
| chr4  | 12110722  | 12110739  | ATGAGGATGCAAACCTTCA | + |
| chr4  | 12896112  | 12896129  | ATGAGGATGCAAACCTTCA | + |
| chr5  | 81793145  | 81793162  | ATGATCATGCAAACCTTCA | + |

|       |           |           |                     |   |
|-------|-----------|-----------|---------------------|---|
| chr11 | 45340059  | 45340076  | GTGATCATGCAAACCTTCA | + |
| chr8  | 127188327 | 127188344 | CTGATCATGCAAACCTTCA | + |
| chr6  | 19008171  | 19008188  | CTGAGCATGCAAACCTTCA | - |
| chr11 | 58951187  | 58951204  | TTGACATTGCAAACCTTCA | + |
| chr6  | 144948772 | 144948789 | ATGATATTGCAAACCTTCA | + |
| chr17 | 27143774  | 27143791  | CTGATATTGCAAACCTTCA | + |
| chr1  | 190829922 | 190829939 | TTGACTTTGCAAACCTTCA | - |
| chr3  | 123885804 | 123885821 | ATGATTTTGCAAACCTTCA | - |
| chr15 | 93412339  | 93412356  | TTGAGTTTGCAAACCTTCA | - |
| chr10 | 80677388  | 80677405  | TTGATGTTGCAAACCTTCA | + |
| chrX  | 65113628  | 65113645  | TTGATGTTGCAAACCTTCA | + |
| chrX  | 89224849  | 89224866  | TTGATGTTGCAAACCTTCA | - |
| chrY  | 6553828   | 6553845   | TTGATGTTGCAAACCTTCA | - |
| chr9  | 70304733  | 70304750  | CTGATGTTGCAAACCTTCA | + |
| chr20 | 8378658   | 8378675   | CTGATGTTGCAAACCTTCA | - |
| chr22 | 46715379  | 46715396  | ATGACCTTGCAAACCTTCA | - |
| chr4  | 184726042 | 184726059 | ATGACAGTGCAAACCTTCA | + |
| chr2  | 145469832 | 145469849 | CTGACAGTGCAAACCTTCA | - |
| chr3  | 117213469 | 117213486 | TTGATGGTGCAAACCTTCA | + |
| chrX  | 145765513 | 145765530 | TTGATACTGCAAACCTTCA | + |
| chr20 | 42543131  | 42543148  | TTGATACTGCAAACCTTCA | - |
| chr8  | 100997012 | 100997029 | ATGACTCTGCAAACCTTCA | - |
| chr2  | 143086848 | 143086865 | CTGATTCTGCAAACCTTCA | + |
| chr4  | 104898403 | 104898420 | ATGATGCTGCAAACCTTCA | - |
| chr7  | 110240424 | 110240441 | TTGATGCTGCAAACCTTCA | + |
| chr7  | 66103946  | 66103963  | TTGATGCTGCAAACCTTCA | - |
| chr14 | 70916788  | 70916805  | TTGATGCTGCAAACCTTCA | - |
| chrX  | 138512535 | 138512552 | TTGATGCTGCAAACCTTCA | - |
| chr2  | 117187617 | 117187634 | GTGATGCTGCAAACCTTCA | + |
| chr7  | 138291175 | 138291192 | CTGATGCTGCAAACCTTCA | - |
| chr22 | 42599718  | 42599735  | CTGAGGCTGCAAACCTTCA | + |
| chr14 | 88008879  | 88008896  | TTGATCCTGCAAACCTTCA | - |
| chr12 | 44145855  | 44145872  | ATGAGCCTGCAAACCTTCA | - |
| chr3  | 50588755  | 50588772  | ATGACAAGGCAAACCTTCA | - |
| chr12 | 42789510  | 42789527  | TTGACAAGGCAAACCTTCA | + |
| chr1  | 204817990 | 204818007 | CTGATAAGGCAAACCTTCA | + |
| chr1  | 63174960  | 63174977  | ATGATGAGGCAAACCTTCA | - |
| chr2  | 168941740 | 168941757 | TTGATGAGGCAAACCTTCA | + |
| chr4  | 180278363 | 180278380 | TTGATGAGGCAAACCTTCA | + |
| chr11 | 133761729 | 133761746 | TTGATGAGGCAAACCTTCA | + |
| chr12 | 39268248  | 39268265  | TTGATGAGGCAAACCTTCA | + |
| chr14 | 61964745  | 61964762  | TTGATGAGGCAAACCTTCA | + |

|       |           |           |                     |   |
|-------|-----------|-----------|---------------------|---|
| chr7  | 138929093 | 138929110 | TTGATGAGGCAAACCTTCA | - |
| chr12 | 82326025  | 82326042  | TTGATGAGGCAAACCTTCA | - |
| chrX  | 152348967 | 152348984 | TTGATGAGGCAAACCTTCA | - |
| chr3  | 197487111 | 197487128 | ATGACCAGGCAAACCTTCA | + |
| chr4  | 14092179  | 14092196  | ATGATCAGGCAAACCTTCA | + |
| chr8  | 138404466 | 138404483 | ATGACATGGCAAACCTTCA | - |
| chr3  | 58446008  | 58446025  | TTGACATGGCAAACCTTCA | - |
| chr2  | 111463890 | 111463907 | GTGACATGGCAAACCTTCA | - |
| chr22 | 46987810  | 46987827  | CTGACATGGCAAACCTTCA | - |
| chr5  | 58201511  | 58201528  | ATGATATGGCAAACCTTCA | + |
| chr2  | 189091383 | 189091400 | TTGATATGGCAAACCTTCA | + |
| chr6  | 56799413  | 56799430  | TTGATATGGCAAACCTTCA | + |
| chrX  | 37084810  | 37084827  | TTGATATGGCAAACCTTCA | + |
| chr3  | 21154904  | 21154921  | TTGATATGGCAAACCTTCA | - |
| chr3  | 114284342 | 114284359 | TTGATATGGCAAACCTTCA | - |
| chr3  | 146202615 | 146202632 | TTGATATGGCAAACCTTCA | - |
| chr4  | 36562556  | 36562573  | TTGATATGGCAAACCTTCA | - |
| chr12 | 51553013  | 51553030  | TTGATATGGCAAACCTTCA | - |
| chr6  | 116756656 | 116756673 | CTGATATGGCAAACCTTCA | + |
| chr3  | 80194479  | 80194496  | ATGAGATGGCAAACCTTCA | - |
| chr1  | 172924751 | 172924768 | TTGATTTGGCAAACCTTCA | - |
| chr18 | 23180293  | 23180310  | GTGAGTTGGCAAACCTTCA | - |
| chr1  | 84561632  | 84561649  | TTGACGTGGCAAACCTTCA | + |
| chr4  | 66697764  | 66697781  | CTGACGTGGCAAACCTTCA | - |
| chr8  | 77417871  | 77417888  | ATGATGTGGCAAACCTTCA | + |
| chr11 | 124988555 | 124988572 | ATGATGTGGCAAACCTTCA | - |
| chr1  | 105272225 | 105272242 | TTGATGTGGCAAACCTTCA | + |
| chr1  | 171599748 | 171599765 | TTGATGTGGCAAACCTTCA | + |
| chr2  | 6175252   | 6175269   | TTGATGTGGCAAACCTTCA | + |
| chr2  | 58064310  | 58064327  | TTGATGTGGCAAACCTTCA | + |
| chr2  | 95239468  | 95239485  | TTGATGTGGCAAACCTTCA | + |
| chr2  | 157354514 | 157354531 | TTGATGTGGCAAACCTTCA | + |
| chr3  | 15946074  | 15946091  | TTGATGTGGCAAACCTTCA | + |
| chr3  | 43975277  | 43975294  | TTGATGTGGCAAACCTTCA | + |
| chr3  | 104481765 | 104481782 | TTGATGTGGCAAACCTTCA | + |
| chr3  | 175254176 | 175254193 | TTGATGTGGCAAACCTTCA | + |
| chr4  | 73034369  | 73034386  | TTGATGTGGCAAACCTTCA | + |
| chr4  | 92372342  | 92372359  | TTGATGTGGCAAACCTTCA | + |
| chr5  | 25045123  | 25045140  | TTGATGTGGCAAACCTTCA | + |
| chr5  | 38082699  | 38082716  | TTGATGTGGCAAACCTTCA | + |
| chr5  | 52827617  | 52827634  | TTGATGTGGCAAACCTTCA | + |
| chr5  | 114457137 | 114457154 | TTGATGTGGCAAACCTTCA | + |

|       |           |           |                     |   |
|-------|-----------|-----------|---------------------|---|
| chr5  | 125097120 | 125097137 | TTGATGTGGCAAACCTTCA | + |
| chr5  | 131630108 | 131630125 | TTGATGTGGCAAACCTTCA | + |
| chr6  | 83664848  | 83664865  | TTGATGTGGCAAACCTTCA | + |
| chr6  | 117242528 | 117242545 | TTGATGTGGCAAACCTTCA | + |
| chr6  | 139866669 | 139866686 | TTGATGTGGCAAACCTTCA | + |
| chr7  | 22485237  | 22485254  | TTGATGTGGCAAACCTTCA | + |
| chr7  | 138656016 | 138656033 | TTGATGTGGCAAACCTTCA | + |
| chr7  | 149362107 | 149362124 | TTGATGTGGCAAACCTTCA | + |
| chr8  | 38479897  | 38479914  | TTGATGTGGCAAACCTTCA | + |
| chr8  | 94660862  | 94660879  | TTGATGTGGCAAACCTTCA | + |
| chr8  | 136472387 | 136472404 | TTGATGTGGCAAACCTTCA | + |
| chr9  | 8323936   | 8323953   | TTGATGTGGCAAACCTTCA | + |
| chr9  | 77224865  | 77224882  | TTGATGTGGCAAACCTTCA | + |
| chr9  | 126822416 | 126822433 | TTGATGTGGCAAACCTTCA | + |
| chr10 | 25738289  | 25738306  | TTGATGTGGCAAACCTTCA | + |
| chr11 | 85621973  | 85621990  | TTGATGTGGCAAACCTTCA | + |
| chr11 | 88845159  | 88845176  | TTGATGTGGCAAACCTTCA | + |
| chr12 | 78797366  | 78797383  | TTGATGTGGCAAACCTTCA | + |
| chr12 | 82112704  | 82112721  | TTGATGTGGCAAACCTTCA | + |
| chr12 | 107013201 | 107013218 | TTGATGTGGCAAACCTTCA | + |
| chr14 | 31955119  | 31955136  | TTGATGTGGCAAACCTTCA | + |
| chr16 | 69546666  | 69546683  | TTGATGTGGCAAACCTTCA | + |
| chr17 | 63035074  | 63035091  | TTGATGTGGCAAACCTTCA | + |
| chr18 | 256845    | 256862    | TTGATGTGGCAAACCTTCA | + |
| chr18 | 22622938  | 22622955  | TTGATGTGGCAAACCTTCA | + |
| chr18 | 29292384  | 29292401  | TTGATGTGGCAAACCTTCA | + |
| chr18 | 35639206  | 35639223  | TTGATGTGGCAAACCTTCA | + |
| chr21 | 39654652  | 39654669  | TTGATGTGGCAAACCTTCA | + |
| chr21 | 40953131  | 40953148  | TTGATGTGGCAAACCTTCA | + |
| chr22 | 43558584  | 43558601  | TTGATGTGGCAAACCTTCA | + |
| chrX  | 68028147  | 68028164  | TTGATGTGGCAAACCTTCA | + |
| chrX  | 132790150 | 132790167 | TTGATGTGGCAAACCTTCA | + |
| chr1  | 32801595  | 32801612  | TTGATGTGGCAAACCTTCA | - |
| chr1  | 103057033 | 103057050 | TTGATGTGGCAAACCTTCA | - |
| chr1  | 213805243 | 213805260 | TTGATGTGGCAAACCTTCA | - |
| chr1  | 227932047 | 227932064 | TTGATGTGGCAAACCTTCA | - |
| chr2  | 33105842  | 33105859  | TTGATGTGGCAAACCTTCA | - |
| chr2  | 75248939  | 75248956  | TTGATGTGGCAAACCTTCA | - |
| chr2  | 210409362 | 210409379 | TTGATGTGGCAAACCTTCA | - |
| chr2  | 215467765 | 215467782 | TTGATGTGGCAAACCTTCA | - |
| chr3  | 119910632 | 119910649 | TTGATGTGGCAAACCTTCA | - |
| chr4  | 100171153 | 100171170 | TTGATGTGGCAAACCTTCA | - |



|       |           |           |                     |   |
|-------|-----------|-----------|---------------------|---|
| chr4  | 106750564 | 106750581 | TTGATGTGGCAAACCTTCA | - |
| chr4  | 135496574 | 135496591 | TTGATGTGGCAAACCTTCA | - |
| chr4  | 144446938 | 144446955 | TTGATGTGGCAAACCTTCA | - |
| chr4  | 179941840 | 179941857 | TTGATGTGGCAAACCTTCA | - |
| chr5  | 63020026  | 63020043  | TTGATGTGGCAAACCTTCA | - |
| chr6  | 25072344  | 25072361  | TTGATGTGGCAAACCTTCA | - |
| chr7  | 13475516  | 13475533  | TTGATGTGGCAAACCTTCA | - |
| chr7  | 87235489  | 87235506  | TTGATGTGGCAAACCTTCA | - |
| chr7  | 124536867 | 124536884 | TTGATGTGGCAAACCTTCA | - |
| chr7  | 132862605 | 132862622 | TTGATGTGGCAAACCTTCA | - |
| chr8  | 98783609  | 98783626  | TTGATGTGGCAAACCTTCA | - |
| chr8  | 100321124 | 100321141 | TTGATGTGGCAAACCTTCA | - |
| chr9  | 93766935  | 93766952  | TTGATGTGGCAAACCTTCA | - |
| chr10 | 28297715  | 28297732  | TTGATGTGGCAAACCTTCA | - |
| chr10 | 32433752  | 32433769  | TTGATGTGGCAAACCTTCA | - |
| chr10 | 74411710  | 74411727  | TTGATGTGGCAAACCTTCA | - |
| chr10 | 92819722  | 92819739  | TTGATGTGGCAAACCTTCA | - |
| chr10 | 95739258  | 95739275  | TTGATGTGGCAAACCTTCA | - |
| chr11 | 19490271  | 19490288  | TTGATGTGGCAAACCTTCA | - |
| chr11 | 49788773  | 49788790  | TTGATGTGGCAAACCTTCA | - |
| chr11 | 83308791  | 83308808  | TTGATGTGGCAAACCTTCA | - |
| chr13 | 42937363  | 42937380  | TTGATGTGGCAAACCTTCA | - |
| chr13 | 112481923 | 112481940 | TTGATGTGGCAAACCTTCA | - |
| chr14 | 22081570  | 22081587  | TTGATGTGGCAAACCTTCA | - |
| chr18 | 3515073   | 3515090   | TTGATGTGGCAAACCTTCA | - |
| chr18 | 14014344  | 14014361  | TTGATGTGGCAAACCTTCA | - |
| chr18 | 78148178  | 78148195  | TTGATGTGGCAAACCTTCA | - |
| chr19 | 43888540  | 43888557  | TTGATGTGGCAAACCTTCA | - |
| chr21 | 41305871  | 41305888  | TTGATGTGGCAAACCTTCA | - |
| chrX  | 47852332  | 47852349  | TTGATGTGGCAAACCTTCA | - |
| chrX  | 86747781  | 86747798  | TTGATGTGGCAAACCTTCA | - |
| chrX  | 108603684 | 108603701 | TTGATGTGGCAAACCTTCA | - |
| chr1  | 214698595 | 214698612 | GTGATGTGGCAAACCTTCA | + |
| chr3  | 58798701  | 58798718  | GTGATGTGGCAAACCTTCA | + |
| chrX  | 7142984   | 7143001   | GTGATGTGGCAAACCTTCA | + |
| chr5  | 115361128 | 115361145 | GTGATGTGGCAAACCTTCA | - |
| chr12 | 45873927  | 45873944  | GTGATGTGGCAAACCTTCA | - |
| chr18 | 64172103  | 64172120  | GTGATGTGGCAAACCTTCA | - |
| chr2  | 34111947  | 34111964  | CTGATGTGGCAAACCTTCA | + |
| chr3  | 64428741  | 64428758  | CTGATGTGGCAAACCTTCA | + |
| chr3  | 128158446 | 128158463 | CTGATGTGGCAAACCTTCA | + |
| chr4  | 32209643  | 32209660  | CTGATGTGGCAAACCTTCA | + |

|       |           |           |                     |   |
|-------|-----------|-----------|---------------------|---|
| chr4  | 113527085 | 113527102 | CTGATGTGGCAAACCTTCA | + |
| chr5  | 14800453  | 14800470  | CTGATGTGGCAAACCTTCA | + |
| chr7  | 135888536 | 135888553 | CTGATGTGGCAAACCTTCA | + |
| chr8  | 81943846  | 81943863  | CTGATGTGGCAAACCTTCA | + |
| chr8  | 129890270 | 129890287 | CTGATGTGGCAAACCTTCA | + |
| chr12 | 94414353  | 94414370  | CTGATGTGGCAAACCTTCA | + |
| chr12 | 106934210 | 106934227 | CTGATGTGGCAAACCTTCA | + |
| chr15 | 72766366  | 72766383  | CTGATGTGGCAAACCTTCA | + |
| chr20 | 24164182  | 24164199  | CTGATGTGGCAAACCTTCA | + |
| chrX  | 53915913  | 53915930  | CTGATGTGGCAAACCTTCA | + |
| chr1  | 51050421  | 51050438  | CTGATGTGGCAAACCTTCA | - |
| chr1  | 214508164 | 214508181 | CTGATGTGGCAAACCTTCA | - |
| chr2  | 213032885 | 213032902 | CTGATGTGGCAAACCTTCA | - |
| chr4  | 78829081  | 78829098  | CTGATGTGGCAAACCTTCA | - |
| chr4  | 92401837  | 92401854  | CTGATGTGGCAAACCTTCA | - |
| chr5  | 162556962 | 162556979 | CTGATGTGGCAAACCTTCA | - |
| chr7  | 25611670  | 25611687  | CTGATGTGGCAAACCTTCA | - |
| chr9  | 83670666  | 83670683  | CTGATGTGGCAAACCTTCA | - |
| chr12 | 45382955  | 45382972  | CTGATGTGGCAAACCTTCA | - |
| chr12 | 63786717  | 63786734  | CTGATGTGGCAAACCTTCA | - |
| chr14 | 23962265  | 23962282  | CTGATGTGGCAAACCTTCA | - |
| chr14 | 23997387  | 23997404  | CTGATGTGGCAAACCTTCA | - |
| chr14 | 24045343  | 24045360  | CTGATGTGGCAAACCTTCA | - |
| chr16 | 51293233  | 51293250  | CTGATGTGGCAAACCTTCA | - |
| chr16 | 57551269  | 57551286  | CTGATGTGGCAAACCTTCA | - |
| chr18 | 42077295  | 42077312  | CTGATGTGGCAAACCTTCA | - |
| chr20 | 8930130   | 8930147   | CTGATGTGGCAAACCTTCA | - |
| chr22 | 30842473  | 30842490  | CTGATGTGGCAAACCTTCA | - |
| chrX  | 127295412 | 127295429 | CTGATGTGGCAAACCTTCA | - |
| chr1  | 224598579 | 224598596 | CTGAGGTGGCAAACCTTCA | + |
| chr22 | 39788716  | 39788733  | ATGACCTGGCAAACCTTCA | + |
| chr14 | 53815170  | 53815187  | TTGACCTGGCAAACCTTCA | - |
| chr9  | 69299148  | 69299165  | TTGATCTGGCAAACCTTCA | - |
| chr18 | 1879222   | 1879239   | TTGATCTGGCAAACCTTCA | - |
| chr10 | 125806611 | 125806628 | ATGAGCTGGCAAACCTTCA | - |
| chr3  | 54950200  | 54950217  | CTGAGCTGGCAAACCTTCA | + |
| chr6  | 92772320  | 92772337  | TTGATAGGGCAAACCTTCA | - |
| chr12 | 52774278  | 52774295  | GTGAGAGGGCAAACCTTCA | + |
| chr7  | 116573723 | 116573740 | TTGACTGGGCAAACCTTCA | - |
| chr19 | 11014082  | 11014099  | CTGATTGGGCAAACCTTCA | + |
| chr13 | 52623929  | 52623946  | ATGAGTGGGCAAACCTTCA | - |
| chr7  | 3746409   | 3746426   | TTGATGGGGCAAACCTTCA | - |

|       |           |           |                      |   |
|-------|-----------|-----------|----------------------|---|
| chr10 | 58728129  | 58728146  | TTGATGGGGCAAACCTTCA  | - |
| chr18 | 78959489  | 78959506  | TTGATGGGGCAAACCTTCA  | - |
| chr8  | 100833427 | 100833444 | ATGACACGGCAAACCTTCA  | - |
| chr6  | 150556019 | 150556036 | TTGATGCGGCAAACCTTCA  | + |
| chr2  | 222528935 | 222528952 | TTGATGCGGCAAACCTTCA  | - |
| chr6  | 106878619 | 106878636 | TTGATGCGGCAAACCTTCA  | - |
| chr14 | 23872511  | 23872528  | CTGATGCGGCAAACCTTCA  | - |
| chr14 | 104917308 | 104917325 | CTGATGCGGCAAACCTTCA  | - |
| chr17 | 41471151  | 41471168  | CTGATGCGGCAAACCTTCA  | - |
| chr8  | 17710200  | 17710217  | TTGATGTGCGCAAACCTTCA | - |
| chr3  | 14295273  | 14295290  | TTGATTGCGCAAACCTTCA  | + |
| chr9  | 32326311  | 32326328  | TTGATGCCGCAAACCTTCA  | - |
| chr6  | 82363319  | 82363336  | TTGAGGCCGCAAACCTTCA  | - |

**Table S2. The 55 genes potentially regulated by the NRF2-RPA1 complex (Related to Figure 6)**

|             | baseMean  | log2FoldChange | lfcSE    | stat     | pvalue   | padj     |
|-------------|-----------|----------------|----------|----------|----------|----------|
| PTPRC       | 13.875275 | 0.145117189    | 0.392874 | 0.369373 | 0.71185  | 0.859227 |
| GNGT1       | 0.8116207 | -0.051592083   | 0.274281 | -0.1881  | 0.850799 | 0.859227 |
| SPATA31A1   | 0.1886614 | 0.02728467     | 0.153839 | 0.177359 | 0.859227 | 0.859227 |
| SPATA31A6   | 0.1886614 | 0.02728467     | 0.153839 | 0.177359 | 0.859227 | 0.859227 |
| SPATA31A7   | 0.3773227 | 0.052924561    | 0.153839 | 0.344026 | 0.730827 | 0.859227 |
| SPATA31A3   | 0.1886614 | 0.02728467     | 0.153839 | 0.177359 | 0.859227 | 0.859227 |
| MAFIP       | 458.86293 | -0.597617441   | 0.120124 | -4.97502 | 6.52E-07 | 5.13E-06 |
| NDST3       | 253.16956 | 0.046553435    | 0.14786  | 0.314848 | 0.752877 | 0.859227 |
| TARS        | 17921.897 | -0.213485484   | 0.075457 | -2.82925 | 0.004666 | 0.016265 |
| ARRDC3      | 3079.6377 | -0.113118508   | 0.202666 | -0.55815 | 0.576741 | 0.859227 |
| TPD52L1     | 3610.7657 | 1.336986881    | 0.133364 | 10.02507 | 1.18E-23 | 1.63E-22 |
| ZNF503-AS1  | 28.35029  | 0.249225007    | 0.328437 | 0.758821 | 0.44796  | 0.724641 |
| RASSF10     | 776.04531 | 1.625751032    | 0.124227 | 13.08696 | 3.91E-39 | 2.15E-37 |
| OXA1L       | 4225.7138 | -0.19015399    | 0.125616 | -1.51377 | 0.130083 | 0.286183 |
| OPRD1       | 1.0784277 | -0.268791087   | 0.256244 | -1.04897 | 0.294193 | 0.525428 |
| LOC339975   | 30.731719 | 0.068560734    | 0.359813 | 0.190545 | 0.848882 | 0.859227 |
| LOC10192938 | 77.656974 | 0.060939806    | 0.238116 | 0.255925 | 0.798009 | 0.859227 |
| ZFAND3      | 673.52295 | 0.03719575     | 0.107884 | 0.344774 | 0.730264 | 0.859227 |
| FAM110B     | 52.911416 | 2.093879695    | 0.326201 | 6.418991 | 1.37E-10 | 1.51E-09 |
| FOCAD       | 7448.2743 | 0.3017846      | 0.080531 | 3.74744  | 0.000179 | 0.000959 |
| C9orf41-AS1 | 304.06667 | -0.172040679   | 0.156358 | -1.1003  | 0.271202 | 0.514349 |
| LINC00924   | 281.68025 | 0.06313254     | 0.144842 | 0.435872 | 0.66293  | 0.859227 |
| IRGC        | 0.1548732 | -0.04963484    | 0.153839 | -0.32264 | 0.746967 | 0.859227 |
| RNF4        | 3163.4074 | 0.105191902    | 0.08541  | 1.231618 | 0.218092 | 0.444261 |
| SLC8A1-AS1  | 7.0184953 | -1.059265822   | 0.375732 | -2.8192  | 0.004814 | 0.016265 |
| MYLK        | 5066.7285 | 0.991947935    | 0.096019 | 10.33073 | 5.12E-25 | 9.38E-24 |
| ARHGAP15    | 2.9103514 | 0.162388445    | 0.33514  | 0.484539 | 0.628004 | 0.859227 |
| PCNX1       | 4494.9918 | 0.378884943    | 0.090813 | 4.172156 | 3.02E-05 | 0.000207 |
| GPR65       | 741.80251 | 0.039546624    | 0.114876 | 0.344255 | 0.730654 | 0.859227 |
| SYT16       | 14.729794 | 1.267117611    | 0.403964 | 3.136708 | 0.001709 | 0.007229 |
| ZNF385D     | 0.1707071 | -0.04963484    | 0.153839 | -0.32264 | 0.746967 | 0.859227 |
| TIGIT       | 3.629013  | 0.426622707    | 0.378022 | 1.128565 | 0.259081 | 0.50891  |
| FAM162B     | 7.0415294 | 0.682923778    | 0.398667 | 1.713019 | 0.086709 | 0.207348 |
| CABLES1     | 1011.5506 | -1.565180784   | 0.125759 | -12.4459 | 1.47E-35 | 4.05E-34 |
| CTBS        | 473.09512 | 0.215801733    | 0.128298 | 1.682035 | 0.092562 | 0.212121 |
| LOC10272487 | 122.33317 | 0.162292385    | 0.199514 | 0.81344  | 0.415966 | 0.693277 |
| GRID2       | 0.9433068 | 0.108154049    | 0.177043 | 0.610891 | 0.541272 | 0.85057  |
| ITGA1       | 197.34904 | 0.92746299     | 0.246479 | 3.762843 | 0.000168 | 0.000959 |
| STEAP1B     | 239.2399  | 0.159791471    | 0.16397  | 0.974517 | 0.3298   | 0.566844 |
| ZBTB43      | 1167.5567 | -0.127994405   | 0.091224 | -1.40308 | 0.160592 | 0.339714 |
| TANC2       | 1597.3854 | 0.567735063    | 0.152222 | 3.729651 | 0.000192 | 0.000959 |
| HS6ST2      | 1.7217019 | -0.058852153   | 0.32279  | -0.18232 | 0.855329 | 0.859227 |
| LANCL1-AS1  | 101.77781 | -0.646698341   | 0.23053  | -2.80527 | 0.005027 | 0.016265 |
| ENTPD1      | 2197.2548 | -0.115727455   | 0.110773 | -1.04472 | 0.29615  | 0.525428 |

|           |           |              |          |          |          |          |
|-----------|-----------|--------------|----------|----------|----------|----------|
| NAV2      | 496.7791  | 0.726590534  | 0.137352 | 5.289995 | 1.22E-07 | 1.12E-06 |
| EEFSEC    | 124.56365 | 0.477310169  | 0.201211 | 2.372189 | 0.017683 | 0.048628 |
| ADGRG5    | 18.332703 | 1.497117155  | 0.415169 | 3.606046 | 0.000311 | 0.001425 |
| CNIH3     | 27.244367 | 0.921189794  | 0.36408  | 2.530185 | 0.0114   | 0.033001 |
| BANCR     | 0.1886614 | 0.02728467   | 0.153839 | 0.177359 | 0.859227 | 0.859227 |
| KRT76     | 852.85909 | -0.525222611 | 0.189633 | -2.76967 | 0.005611 | 0.017146 |
| LINC01510 | 11.797206 | 0.736540416  | 0.415219 | 1.773862 | 0.076086 | 0.190215 |
| HNRNPA1L2 | 10647.351 | -0.22541642  | 0.073316 | -3.07459 | 0.002108 | 0.008281 |
| KRT32     | 2.4513564 | -0.687294884 | 0.350988 | -1.95817 | 0.05021  | 0.131502 |
| LINC01267 | 1.1348389 | -0.104316523 | 0.21959  | -0.47505 | 0.63475  | 0.859227 |
| TPBG      | 2414.2215 | -0.035804899 | 0.073317 | -0.48836 | 0.625294 | 0.859227 |

## References

1. Wu T, et al. (2014) Hrd1 suppresses Nrf2-mediated cellular protection during liver cirrhosis. *Genes & development* 28(7):708-722.
2. Wu T, et al. (2014) Poly(ADP-ribose) polymerase-1 modulates Nrf2-dependent transcription. *Free radical biology & medicine* 67:69-80.
3. Tao S, et al. (2017) p97 Negatively Regulates NRF2 by Extracting Ubiquitylated NRF2 from the KEAP1-CUL3 E3 Complex. *Molecular and Cellular Biology* 37(8): e00660-16.
4. Tao S, et al. (2016) Bixin protects mice against ventilation-induced lung injury in an NRF2-dependent manner. *Scientific reports* 6:18760.
